# Supplementary material
Source: Research Square preprint supplement (doi:10.21203/rs.3.rs-9421274/v1)
Supplement: Supplementary file 1 [file 2a0962949580a4fcbbda6685.xlsx]

## Sheet: DEG_list_rat_POA_neuron_markerC
gene	p_val	avg_log2FC	pct.1	pct.2	p_val_adj	cluster
Skor2	0	6.62248	0.234	0.004	0	e01
Sox14	4.88e-139	3.96675	0.191	0.014	9.12e-135	e01
Tmem163	1.47e-107	1.6399	0.818	0.336	2.76e-103	e01
Cacna2d1	1.07e-99	1.3468	0.964	0.662	2e-95	e01
Kif26b	1.01e-87	1.33136	0.926	0.601	1.9e-83	e01
Nptx2	5.88e-74	2.45564	0.289	0.062	1.1e-69	e01
AABR07071294.1	5.56e-73	4.62305	0.065	0.003	1.04e-68	e01
Il1rapl1	2.78e-69	0.697939	1	0.975	5.2e-65	e01
Slc17a6	6.93e-60	1.32784	0.629	0.276	1.3e-55	e01
LOC102547937	5.66e-54	4.13925	0.074	0.006	1.06e-49	e01
Rbfox1	2.05e-52	0.762424	0.981	0.801	3.84e-48	e01
Prlr	2.1e-52	1.14305	0.792	0.481	3.92e-48	e01
Ephb1	5e-43	1.11987	0.833	0.584	9.34e-39	e01
Grm8	7.59e-42	1.06268	0.844	0.613	1.42e-37	e01
AABR07048878.1	5.94e-40	0.923211	0.876	0.68	1.11e-35	e01
Sgcd	7.91e-34	0.879633	0.778	0.535	1.48e-29	e01
Car10	7e-33	0.552645	0.971	0.784	1.31e-28	e01
AABR07003304.2	1.46e-31	1.65283	0.39	0.182	2.72e-27	e01
Calcr	3.22e-31	0.968157	0.555	0.309	6.02e-27	e01
Slit2	4.7e-30	0.906089	0.789	0.57	8.79e-26	e01
LOC498084	1.77e-28	0.796477	0.766	0.537	3.32e-24	e01
Mgat4d	2.7e-28	1.17324	0.45	0.229	5.06e-24	e01
Unc13c	7.05e-28	0.826788	0.636	0.384	1.32e-23	e01
AABR07064373.1	1.79e-27	1.88654	0.146	0.038	3.35e-23	e01
Fxyd7	3.32e-26	1.50939	0.256	0.098	6.22e-22	e01
AABR07029526.1	1.29e-25	1.28623	0.397	0.196	2.42e-21	e01
Khdrbs3	1.16e-24	0.800544	0.725	0.532	2.18e-20	e01
Adgrl2	5.46e-24	0.707108	0.816	0.611	1.02e-19	e01
Ptprg	1.24e-23	0.561961	0.892	0.759	2.32e-19	e01
Cntnap5b	1.5e-23	0.707396	0.921	0.815	2.8e-19	e01
Cdh13	3.56e-23	0.445881	0.955	0.833	6.66e-19	e01
Adcyap1	6.41e-23	1.27862	0.323	0.149	1.2e-18	e01
Ppp2r2b	4.64e-22	0.360958	0.998	0.972	8.68e-18	e01
Grk5	5.14e-22	0.920529	0.667	0.472	9.62e-18	e01
Nrxn1	5.5e-22	0.218761	1	1	1.03e-17	e01
Adam32	1.17e-21	1.34183	0.33	0.159	2.2e-17	e01
Nav2	1.51e-21	0.415756	0.988	0.94	2.83e-17	e01
Gria1	2.28e-21	0.478398	0.952	0.866	4.26e-17	e01
Gabrb1	5.33e-21	0.329275	0.998	0.99	9.97e-17	e01
Sorcs3	8.87e-20	0.749941	0.77	0.629	1.66e-15	e01
Nell2	1.24e-19	0.520918	0.84	0.654	2.32e-15	e01
Rbms3	2.04e-19	0.483666	0.902	0.745	3.81e-15	e01
Dync1i1	4.61e-19	0.387133	0.969	0.922	8.63e-15	e01
Grid2	1.25e-18	0.388793	0.981	0.906	2.34e-14	e01
Pnck	1.5e-18	0.54583	0.804	0.641	2.8e-14	e01
Ppef2	2.3e-18	1.45251	0.225	0.098	4.31e-14	e01
Lrfn5	7.39e-18	0.38026	0.99	0.975	1.38e-13	e01
Ramp3	1.1e-17	1.89013	0.12	0.037	2.06e-13	e01
Gzmm	1.53e-17	1.8106	0.132	0.043	2.86e-13	e01
Tnni3k	1.62e-17	1.21695	0.201	0.083	3.03e-13	e01
Ldb2	6.81e-17	0.479806	0.821	0.64	1.27e-12	e01
Brs3	9.24e-17	2.30905	0.057	0.011	1.73e-12	e01
Gphn	1.75e-16	0.385464	0.993	0.986	3.27e-12	e01
Cyp11b2	1.94e-16	2.99459	0.048	0.008	3.64e-12	e01
Dpyd	3.69e-16	0.506389	0.888	0.747	6.91e-12	e01
Cntnap5c	1.95e-15	0.382907	0.911	0.806	3.64e-11	e01
AABR07071662.1	2.11e-15	3.59298	0.026	0.003	3.94e-11	e01
Lsamp	2.28e-15	0.324617	0.971	0.946	4.26e-11	e01
Nebl	3.39e-15	0.332863	0.959	0.896	6.34e-11	e01
Zfhx3	5.08e-15	0.416259	0.859	0.671	9.5e-11	e01
Tmem132d	5.23e-15	0.314463	0.919	0.755	9.77e-11	e01
Ston2	6.01e-15	1.01368	0.321	0.178	1.12e-10	e01
Igsf21	6.43e-15	1.05765	0.256	0.126	1.2e-10	e01
Edil3	6.61e-15	0.386213	0.943	0.869	1.24e-10	e01
Kcnq3	8.06e-15	0.35322	0.959	0.873	1.51e-10	e01
Ano5	9.14e-15	1.111	0.254	0.127	1.71e-10	e01
Pgr	1.11e-14	0.982922	0.471	0.311	2.07e-10	e01
Tmem65	1.25e-14	0.72961	0.658	0.499	2.35e-10	e01
Fat3	1.54e-14	0.508117	0.864	0.741	2.88e-10	e01
Brinp3	1.99e-14	0.287902	0.986	0.893	3.72e-10	e01
Neto1	3.35e-14	0.413398	0.83	0.644	6.26e-10	e01
Kcnh5	3.44e-14	0.645652	0.66	0.501	6.43e-10	e01
Clnk	4.23e-14	0.942277	0.368	0.22	7.91e-10	e01
Rab26	5.3e-14	0.56388	0.677	0.513	9.91e-10	e01
Eomes	6.22e-14	5.07709	0.012	0.001	1.16e-09	e01
Rasal1	6.27e-14	0.86338	0.364	0.213	1.17e-09	e01
Pcsk2	6.84e-14	0.469425	0.868	0.746	1.28e-09	e01
Plagl1	7.62e-14	1.60165	0.12	0.043	1.42e-09	e01
Krt1	9.17e-14	2.4098	0.048	0.009	1.72e-09	e01
Bcl11a	9.82e-14	0.550963	0.617	0.447	1.84e-09	e01
Col15a1	1.13e-13	2.03129	0.057	0.013	2.12e-09	e01
AABR07050265.1	1.23e-13	0.948228	0.239	0.118	2.31e-09	e01
Sptlc3	1.24e-13	0.791218	0.531	0.367	2.32e-09	e01
Crtac1	1.36e-13	0.646301	0.476	0.311	2.55e-09	e01
Cacna1g	1.47e-13	0.49284	0.794	0.652	2.75e-09	e01
Dgki	1.77e-13	0.343585	0.971	0.929	3.31e-09	e01
Tnik	1.85e-13	0.266432	0.99	0.969	3.46e-09	e01
Catsperg	2.09e-13	0.769425	0.402	0.244	3.91e-09	e01
Tmem255a	2.54e-13	0.561774	0.684	0.535	4.74e-09	e01
Rgs9	3.3e-13	0.380916	0.636	0.469	6.17e-09	e01
Kif4a	3.56e-13	2.19698	0.053	0.012	6.65e-09	e01
Plxna4	3.6e-13	0.391272	0.938	0.829	6.73e-09	e01
Fn1	3.78e-13	3.03294	0.045	0.009	7.07e-09	e01
Csmd2	3.88e-13	0.355447	0.947	0.876	7.27e-09	e01
Susd4	4.01e-13	0.444234	0.778	0.639	7.49e-09	e01
Ppp1r12b	5.95e-13	0.352744	0.926	0.847	1.11e-08	e01
Isyna1	6.43e-13	0.646996	0.543	0.389	1.2e-08	e01
Ablim2	6.75e-13	0.416226	0.873	0.78	1.26e-08	e01
Setd7	7.44e-13	0.418578	0.888	0.8	1.39e-08	e01
Pcdh7	7.66e-13	0.516018	0.718	0.548	1.43e-08	e01
Robo1	8.22e-13	0.335647	0.928	0.828	1.54e-08	e01
Nppa	1.14e-12	1.61947	0.098	0.033	2.14e-08	e01
Timp3	1.5e-12	0.613234	0.667	0.516	2.81e-08	e01
Plcxd2	1.65e-12	0.967426	0.28	0.155	3.09e-08	e01
Kcnk13	1.81e-12	0.881453	0.316	0.181	3.39e-08	e01
Adamts16	1.82e-12	1.80337	0.122	0.047	3.4e-08	e01
Anks1b	2.49e-12	0.211768	1	0.993	4.67e-08	e01
Aff2	2.79e-12	0.452353	0.868	0.771	5.21e-08	e01
Zmiz1	2.99e-12	0.446726	0.854	0.726	5.58e-08	e01
ENSRNOG00000051922	3.06e-12	3.35651	0.096	0.033	5.73e-08	e01
Slc4a5	3.13e-12	3.10673	0.029	0.004	5.85e-08	e01
AABR07036411.1	3.13e-12	1.13757	0.163	0.072	5.85e-08	e01
Cgnl1	3.81e-12	1.82418	0.072	0.021	7.13e-08	e01
Ncam2	4.99e-12	0.341364	0.916	0.795	9.32e-08	e01
Nedd9	5.05e-12	0.930004	0.388	0.253	9.45e-08	e01
Gda	5.98e-12	0.91482	0.361	0.223	1.12e-07	e01
Astn2	7e-12	0.410254	0.955	0.924	1.31e-07	e01
Mctp2	7.22e-12	0.737066	0.33	0.195	1.35e-07	e01
Glra3	7.49e-12	0.688656	0.505	0.351	1.4e-07	e01
Shroom3	8.75e-12	1.00842	0.275	0.156	1.64e-07	e01
Ntng1	8.89e-12	0.352851	0.608	0.431	1.66e-07	e01
Rsph10b	9.11e-12	0.861894	0.388	0.255	1.7e-07	e01
LOC304725	9.49e-12	0.330596	0.895	0.791	1.78e-07	e01
Tac1	1.12e-11	0.885635	0.294	0.172	2.1e-07	e01
Nkx2-1	1.32e-11	1.39631	0.108	0.04	2.47e-07	e01
AABR07019254.2	1.38e-11	0.822368	0.289	0.164	2.57e-07	e01
Btbd19	1.45e-11	0.634908	0.605	0.465	2.72e-07	e01
Nxph3	2.01e-11	1.54902	0.091	0.031	3.76e-07	e01
AABR07070331.1	2.91e-11	2.9017	0.029	0.005	5.45e-07	e01
LOC691995	2.92e-11	0.449196	0.751	0.628	5.47e-07	e01
Tmem215	3.09e-11	1.53462	0.103	0.038	5.79e-07	e01
Rxrg	3.74e-11	0.823745	0.218	0.111	7e-07	e01
Baiap3	5.96e-11	0.353879	0.83	0.697	1.12e-06	e01
Pde11a	6.11e-11	0.716246	0.263	0.148	1.14e-06	e01
Shc2	7.1e-11	0.46628	0.78	0.672	1.33e-06	e01
Efna5	7.52e-11	0.377134	0.813	0.695	1.41e-06	e01
Ankrd6	8.6e-11	0.394771	0.785	0.682	1.61e-06	e01
AABR07033184.1	1.04e-10	0.328207	0.84	0.678	1.94e-06	e01
Igfbp5	1.23e-10	0.575602	0.325	0.196	2.29e-06	e01
Focad	1.31e-10	0.292743	0.967	0.902	2.45e-06	e01
Btbd11	1.8e-10	0.426117	0.706	0.567	3.37e-06	e01
Bbs9	2.15e-10	0.478429	0.739	0.63	4.01e-06	e01
Col2a1	2.57e-10	1.35934	0.124	0.053	4.8e-06	e01
Kirrel	3.21e-10	0.715466	0.397	0.267	6.01e-06	e01
Eda	3.43e-10	0.639362	0.502	0.372	6.41e-06	e01
Ntrk3	3.45e-10	0.301782	0.964	0.927	6.44e-06	e01
Mapk11	3.49e-10	0.328145	0.928	0.847	6.53e-06	e01
Pitpnm3	3.59e-10	0.43946	0.634	0.5	6.71e-06	e01
Sema3d	4.2e-10	1.2712	0.139	0.063	7.85e-06	e01
Smarcd3	6.01e-10	0.448666	0.706	0.564	1.12e-05	e01
Htr4	7e-10	0.337247	0.754	0.618	1.31e-05	e01
Scn5a	7.54e-10	0.588477	0.469	0.335	1.41e-05	e01
Flrt2	7.84e-10	0.611551	0.639	0.532	1.47e-05	e01
Adgrb3	7.87e-10	0.217704	1	0.995	1.47e-05	e01
L3mbtl1	8.11e-10	0.450622	0.634	0.506	1.52e-05	e01
Cox6b2	8.7e-10	1.33787	0.103	0.041	1.63e-05	e01
AABR07010468.1	9.19e-10	0.668137	0.488	0.366	1.72e-05	e01
Phactr2	9.2e-10	0.889341	0.311	0.195	1.72e-05	e01
Ccdc60	1.13e-09	1.10563	0.136	0.062	2.11e-05	e01
Plpp4	1.14e-09	0.682849	0.356	0.232	2.13e-05	e01
Kcnq5	1.2e-09	0.574661	0.581	0.445	2.25e-05	e01
Cpne4	1.27e-09	0.302208	0.572	0.413	2.37e-05	e01
NEWGENE-1310139	1.31e-09	0.42442	0.72	0.596	2.44e-05	e01
LOC102551716	1.67e-09	0.234299	0.962	0.887	3.12e-05	e01
Chrna7	1.73e-09	0.597322	0.428	0.302	3.23e-05	e01
Prkag2	1.73e-09	0.413019	0.768	0.666	3.23e-05	e01
Tle2	1.86e-09	0.810229	0.273	0.163	3.47e-05	e01
Pcdh17	1.99e-09	0.364433	0.852	0.762	3.73e-05	e01
Olfm2	2.07e-09	0.397472	0.754	0.628	3.87e-05	e01
Mmp23	2.1e-09	1.65244	0.081	0.029	3.94e-05	e01
Grm6	2.18e-09	1.99357	0.062	0.02	4.07e-05	e01
Sez6l	2.19e-09	0.308987	0.833	0.72	4.1e-05	e01
Tmem91	2.46e-09	0.358965	0.809	0.702	4.6e-05	e01
Vwa3a	2.48e-09	0.632451	0.45	0.314	4.64e-05	e01
Prkce	3.13e-09	0.458795	0.73	0.628	5.86e-05	e01
AABR07034293.1	3.27e-09	0.793728	0.254	0.148	6.11e-05	e01
Capn8	3.95e-09	1.4559	0.089	0.034	7.39e-05	e01
Grik4	4.52e-09	0.450177	0.761	0.649	8.46e-05	e01
Tmem145	5.11e-09	0.483206	0.718	0.608	9.55e-05	e01
Fam179a	5.68e-09	0.97404	0.172	0.089	0.000106202	e01
Eln	6.68e-09	0.777902	0.234	0.137	0.000124903	e01
Pi16	7.04e-09	1.06592	0.146	0.071	0.000131707	e01
Itpr1	7.66e-09	0.327215	0.751	0.612	0.000143283	e01
Plch2	9.16e-09	0.538287	0.428	0.295	0.0001714	e01
Card9	1.24e-08	1.15627	0.134	0.064	0.000231247	e01
Pdzrn4	1.28e-08	0.486551	0.6	0.462	0.000238817	e01
ENSRNOG00000046343	1.41e-08	0.728202	0.249	0.148	0.000263462	e01
Ptpru	1.42e-08	0.587809	0.474	0.352	0.000265925	e01
Cdh8	1.44e-08	0.233738	0.888	0.775	0.000268527	e01
Cpne9	1.46e-08	0.701213	0.289	0.183	0.000272823	e01
Ntrk2	1.52e-08	0.184943	1	0.984	0.000284265	e01
Kcnma1	1.55e-08	0.220119	0.993	0.98	0.000289069	e01
Grm1	1.62e-08	0.339519	0.902	0.783	0.000303065	e01
Atxn7l1	1.67e-08	0.266047	0.928	0.841	0.000311826	e01
Ryr2	1.69e-08	0.250546	0.943	0.841	0.000315458	e01
Limch1	2.07e-08	0.241382	0.974	0.938	0.000388059	e01
Tspan1	2.19e-08	0.759145	0.268	0.166	0.000410375	e01
Csmd1	2.21e-08	0.274592	0.856	0.74	0.000413302	e01
Ank2	2.27e-08	0.138053	0.998	0.997	0.000424582	e01
Galr1	2.3e-08	1.20178	0.148	0.076	0.000430543	e01
Pde9a	2.63e-08	0.385364	0.656	0.535	0.000491244	e01
Tox2	2.82e-08	0.321083	0.835	0.698	0.000527154	e01
Pcdh11x	3.36e-08	0.323101	0.55	0.417	0.000628553	e01
Nell1	3.66e-08	0.203512	0.837	0.719	0.000684245	e01
Magi1	4.16e-08	0.318633	0.974	0.947	0.000777752	e01
Garnl3	4.57e-08	0.305623	0.859	0.756	0.000854095	e01
AABR07058699.1	4.84e-08	0.82631	0.356	0.252	0.000904324	e01
AABR07072264.2	4.85e-08	0.533795	0.371	0.251	0.000907009	e01
Nr2f2	4.97e-08	0.611378	0.467	0.339	0.000929821	e01
Ly6k	5.02e-08	1.92475	0.041	0.011	0.00093955	e01
Slc9b2	5.69e-08	0.738787	0.232	0.139	0.00106477	e01
Sh3pxd2b	5.9e-08	0.762107	0.347	0.243	0.00110371	e01
Fam173a	5.95e-08	0.35433	0.689	0.555	0.00111366	e01
Loxl1	6.11e-08	1.12918	0.115	0.053	0.00114252	e01
Cpeb1	6.19e-08	0.349146	0.794	0.707	0.00115738	e01
St6galnac3	6.41e-08	0.425065	0.696	0.581	0.00119879	e01
Prkcg	6.43e-08	0.369243	0.734	0.621	0.00120221	e01
Lrp1b.1	6.99e-08	0.623263	0.526	0.412	0.0013081	e01
Pde5a	7.08e-08	1.42259	0.117	0.055	0.00132342	e01
Tango2	7.68e-08	0.280323	0.923	0.837	0.00143649	e01
Olr1411	7.94e-08	1.88256	0.055	0.018	0.00148569	e01
Agbl3	8.15e-08	0.306914	0.818	0.743	0.00152396	e01
LOC103690141	8.47e-08	0.32211	0.902	0.809	0.00158348	e01
Gabra5	1.01e-07	0.389398	0.51	0.37	0.0018897	e01
Podxl	1.04e-07	0.842503	0.175	0.095	0.00194066	e01
AABR07055162.1	1.07e-07	0.616377	0.388	0.279	0.0019971	e01
AABR07048856.1	1.14e-07	1.04487	0.103	0.046	0.00213258	e01
Hpcal4	1.2e-07	0.478842	0.522	0.408	0.00224199	e01
Galnt10	1.28e-07	0.592714	0.337	0.227	0.0024002	e01
Mical3	1.43e-07	0.26713	0.856	0.773	0.00267675	e01
Jakmip2	1.49e-07	0.223817	0.945	0.921	0.0027911	e01
Scml4	1.6e-07	0.385253	0.615	0.489	0.00298751	e01
Nos1	1.62e-07	0.610155	0.416	0.304	0.00302895	e01
Dtna	1.68e-07	0.33246	0.797	0.723	0.00314556	e01
Lrrtm3	1.69e-07	0.183155	0.943	0.857	0.00315439	e01
Kctd4	1.7e-07	1.14624	0.153	0.083	0.00318231	e01
Zfp93	1.8e-07	0.881264	0.17	0.094	0.00336906	e01
Srsf7	2.04e-07	0.239701	0.983	0.955	0.0038063	e01
Kcnk2	2.12e-07	0.382547	0.754	0.658	0.00397257	e01
Fam168a	2.15e-07	0.210024	0.974	0.943	0.00402452	e01
Ttll3	2.29e-07	0.508825	0.538	0.431	0.00427988	e01
Syn3	2.34e-07	0.243892	0.945	0.898	0.00437105	e01
Hmx2	2.39e-07	1.32054	0.067	0.025	0.00446945	e01
Ptprn2	2.58e-07	0.15397	1	0.992	0.00481603	e01
RT1-DOb	2.59e-07	3.03766	0.017	0.003	0.00484683	e01
Prkcb	2.61e-07	0.262091	0.878	0.803	0.00488627	e01
Ccdc180	2.66e-07	0.69107	0.211	0.124	0.00497876	e01
AABR07059024.1	3.21e-07	0.821309	0.242	0.153	0.00600619	e01
Scn1a	3.55e-07	0.202748	0.957	0.904	0.00664456	e01
Lzts3	3.76e-07	0.370907	0.644	0.529	0.00703429	e01
RGD1560028	3.83e-07	1.10941	0.096	0.043	0.00716659	e01
Ar	3.89e-07	0.543348	0.419	0.316	0.00726841	e01
Per3	3.96e-07	0.327939	0.763	0.671	0.00740976	e01
Usp26	4.4e-07	2.89596	0.017	0.003	0.00823427	e01
Lemd1	4.64e-07	0.469025	0.45	0.337	0.00867182	e01
Chst11	4.65e-07	0.324451	0.768	0.661	0.00870391	e01
Potec	5.29e-07	0.622678	0.419	0.314	0.00988845	e01
Styxl1	5.48e-07	0.513329	0.49	0.377	0.0102414	e01
Mettl11b	6.03e-07	2.30615	0.022	0.004	0.011275	e01
Grin2b	6.25e-07	0.133644	0.993	0.985	0.0116941	e01
Nek5	6.34e-07	0.88635	0.172	0.099	0.0118643	e01
Chst8	6.36e-07	0.601067	0.359	0.252	0.0118935	e01
Adamts9	6.51e-07	1.18397	0.163	0.091	0.0121723	e01
Decr2	6.79e-07	0.483374	0.455	0.349	0.0127024	e01
Grin2a	6.87e-07	0.502043	0.471	0.364	0.0128495	e01
Sh3gl2	6.92e-07	0.325488	0.883	0.831	0.0129376	e01
Ablim3	6.92e-07	0.299532	0.773	0.688	0.0129393	e01
Srrm4	8.02e-07	0.27444	0.844	0.747	0.0150046	e01
AABR07069067.1	8.29e-07	1.29915	0.067	0.027	0.015504	e01
Gabrb2	8.46e-07	0.231512	0.897	0.786	0.0158266	e01
Fgf13	8.81e-07	0.430728	0.478	0.366	0.0164715	e01
Zfp692	8.86e-07	0.357072	0.708	0.61	0.0165635	e01
Pus7	8.9e-07	0.419278	0.636	0.544	0.0166549	e01
AABR07051882.2	8.94e-07	0.748781	0.273	0.182	0.0167221	e01
Vwa5b2	9.39e-07	0.402768	0.665	0.567	0.0175703	e01
Slc9a5	9.47e-07	0.485548	0.438	0.33	0.017718	e01
Fhad1	9.92e-07	0.640689	0.199	0.118	0.0185516	e01
Dpp6	1.14e-06	0.167284	0.99	0.978	0.0212607	e01
Dnajc6	1.17e-06	0.173123	0.993	0.967	0.0219133	e01
Hdac10	1.18e-06	0.710669	0.278	0.188	0.0220056	e01
Pirt	1.27e-06	1.50763	0.055	0.02	0.0237957	e01
Sla	1.35e-06	2.30279	0.019	0.004	0.0252252	e01
Rgs22	1.36e-06	0.6875	0.263	0.174	0.025422	e01
Bdnf	1.36e-06	0.538534	0.232	0.146	0.0254489	e01
Adam5	1.41e-06	1.67615	0.041	0.013	0.0264067	e01
AABR07054490.1	1.41e-06	0.899367	0.139	0.075	0.0264234	e01
Gdpd2	1.45e-06	0.850398	0.153	0.086	0.0270808	e01
Galnt16	1.47e-06	0.200704	0.89	0.806	0.0274872	e01
Rapgef6	1.48e-06	0.219376	0.943	0.897	0.0276295	e01
Ube2u	1.56e-06	2.35209	0.024	0.005	0.0291005	e01
AABR07019254.1	1.61e-06	0.741198	0.156	0.087	0.0301867	e01
Adam34l	1.71e-06	2.20144	0.026	0.006	0.0320591	e01
Ap1s2	1.72e-06	0.591009	0.309	0.212	0.032135	e01
Htr2a	1.73e-06	0.758452	0.227	0.145	0.0323663	e01
Cacna1e	1.73e-06	0.187711	0.978	0.952	0.0323943	e01
Adgrl3	1.73e-06	0.180259	0.995	0.977	0.0324413	e01
Kcnj6	1.88e-06	0.421961	0.464	0.352	0.0351038	e01
Ky	1.92e-06	1.30691	0.096	0.046	0.0359981	e01
Myt1l	1.95e-06	0.169367	0.998	0.987	0.0363836	e01
Ptchd4	2.03e-06	0.332268	0.732	0.639	0.0380484	e01
AABR07025345.1	2.21e-06	1.25497	0.091	0.043	0.0412793	e01
Adam12	2.23e-06	0.458663	0.33	0.233	0.0416972	e01
Hapln4	2.27e-06	0.434015	0.474	0.371	0.0425327	e01
Npy5r	2.33e-06	0.981066	0.139	0.076	0.0436654	e01
Tenm2	2.4e-06	0.123444	0.971	0.855	0.0448648	e01
Psd3	2.5e-06	0.219549	0.825	0.733	0.0467124	e01
Ak5	2.64e-06	0.254093	0.785	0.69	0.0494162	e01
Taf1d	2.64e-06	0.173393	0.974	0.95	0.049458	e01
Srsf10	2.69e-06	0.355301	0.679	0.611	0.0502675	e01
Cpz	2.89e-06	3.01426	0.017	0.003	0.0540186	e01
Dnm3	3.04e-06	0.214303	0.986	0.968	0.0568291	e01
Hdac7	3.07e-06	0.581166	0.337	0.244	0.0574458	e01
AABR07013746.1	3.12e-06	1.18806	0.089	0.042	0.0583191	e01
Trpc5	3.19e-06	0.385584	0.615	0.521	0.0596209	e01
Fcho1	3.29e-06	0.44407	0.586	0.496	0.0615207	e01
Angpt1	3.36e-06	0.533132	0.261	0.173	0.0628029	e01
Rhbdl1	3.45e-06	0.353396	0.679	0.581	0.0645109	e01
A2ml1	3.58e-06	1.26068	0.06	0.024	0.0669856	e01
LOC102552318	3.66e-06	3.17596	0.01	0.001	0.0684403	e01
Angpt4	3.75e-06	1.30249	0.069	0.03	0.0700542	e01
Sh2b2	3.89e-06	0.560688	0.292	0.2	0.0727682	e01
LOC102553774	3.91e-06	1.64299	0.036	0.011	0.0731428	e01
Kif14	3.91e-06	0.927979	0.127	0.068	0.073201	e01
Vps53	4.39e-06	0.239931	0.904	0.821	0.0821665	e01
Atp13a2	4.53e-06	0.239162	0.892	0.82	0.0847534	e01
Otof	4.55e-06	0.598272	0.333	0.243	0.085015	e01
Dock6	4.57e-06	0.826172	0.17	0.101	0.0854902	e01
Dhrs2	4.79e-06	3.37715	0.012	0.002	0.089582	e01
Camkv	4.81e-06	0.345412	0.522	0.414	0.0899292	e01
Dscam	4.93e-06	0.204735	0.959	0.904	0.0922074	e01
Mroh7	5.03e-06	0.687922	0.256	0.174	0.0941356	e01
Rasl10a	5.22e-06	1.2041	0.074	0.033	0.0976494	e01
Iqsec2	5.28e-06	0.306283	0.711	0.616	0.0987233	e01
Ildr1	5.72e-06	1.50926	0.038	0.012	0.107025	e01
Scarf2	5.98e-06	0.758163	0.179	0.111	0.111922	e01
Zfp541	6.12e-06	1.53619	0.045	0.016	0.114515	e01
Fcgbp	6.42e-06	1.01457	0.086	0.041	0.120031	e01
Msmb	6.61e-06	2.28882	0.017	0.003	0.123571	e01
Epcam	6.66e-06	1.4732	0.038	0.012	0.124581	e01
Fer1l6	6.77e-06	1.04405	0.117	0.063	0.126624	e01
Tcerg1l	7.01e-06	0.335364	0.471	0.359	0.131099	e01
Klhl4	7.54e-06	0.523197	0.206	0.13	0.141014	e01
Cdc42bpb	7.86e-06	0.24171	0.856	0.802	0.147098	e01
Rnf152	7.88e-06	0.73464	0.232	0.154	0.147341	e01
LOC361016	7.99e-06	0.310808	0.392	0.288	0.149371	e01
Camk1d	8.37e-06	0.200214	0.691	0.588	0.156585	e01
Nova1	8.55e-06	0.204722	0.94	0.895	0.159876	e01
Krt39	8.92e-06	2.58463	0.014	0.002	0.166752	e01
Bpifb5	8.93e-06	3.0413	0.012	0.002	0.167052	e01
Tmem63c	9e-06	0.319239	0.665	0.571	0.168374	e01
Fam189a1	9.04e-06	0.24212	0.809	0.766	0.169068	e01
Bend6	9.15e-06	0.346064	0.667	0.582	0.171131	e01
AABR07049892.1	9.23e-06	2.23621	0.024	0.006	0.172679	e01
Gse1	9.42e-06	0.373584	0.538	0.432	0.176234	e01
Mapk15	9.46e-06	0.717678	0.184	0.114	0.176875	e01
Slit3	9.95e-06	0.283125	0.543	0.416	0.186111	e01
P3h3	1.02e-05	0.293971	0.813	0.726	0.191086	e01
Ces1d	1.02e-05	2.07757	0.026	0.007	0.191433	e01
Pard3	1.06e-05	0.207684	0.926	0.846	0.19908	e01
Gpr83	1.08e-05	0.844064	0.124	0.068	0.202577	e01
Camk2a	1.18e-05	0.163845	0.933	0.872	0.221036	e01
Tm4sf4	1.21e-05	0.597036	0.244	0.163	0.226006	e01
Doc2b	1.21e-05	0.789514	0.165	0.101	0.226843	e01
Washc1	1.23e-05	0.455755	0.474	0.381	0.229227	e01
Podxl2	1.3e-05	0.218821	0.916	0.883	0.242491	e01
Rn60-7-1034.1	1.3e-05	0.837267	0.124	0.069	0.243975	e01
Mapk4	1.34e-05	0.647095	0.227	0.151	0.25033	e01
Creg2	1.34e-05	0.563984	0.28	0.196	0.250916	e01
Fam92b	1.36e-05	0.822129	0.096	0.048	0.253699	e01
Accs	1.43e-05	0.755282	0.163	0.098	0.267696	e01
Fam227a	1.44e-05	0.242232	0.653	0.547	0.26851	e01
Sox2	1.45e-05	0.529726	0.299	0.213	0.270743	e01
Uba52	1.49e-05	0.277225	0.732	0.641	0.278402	e01
Slc7a14	1.49e-05	0.24032	0.799	0.697	0.279018	e01
Selenom	1.53e-05	0.36579	0.512	0.418	0.285545	e01
Txlnb	1.55e-05	1.74692	0.033	0.011	0.29035	e01
Thbs3	1.57e-05	1.44179	0.067	0.03	0.293292	e01
Lhx9	1.6e-05	0.960149	0.065	0.028	0.298337	e01
Zmynd8	1.6e-05	0.144803	0.981	0.967	0.299202	e01
Ppil1	1.62e-05	0.356191	0.388	0.284	0.30214	e01
Arl5c	1.62e-05	1.69388	0.036	0.012	0.302688	e01
LOC654482	1.77e-05	0.645207	0.294	0.216	0.330899	e01
Sorbs2	1.84e-05	0.181732	0.943	0.912	0.34364	e01
Pik3r6	1.86e-05	1.45213	0.038	0.013	0.347391	e01
Gata5	2.05e-05	1.52092	0.053	0.021	0.3825	e01
Lss	2.08e-05	0.434842	0.459	0.364	0.388676	e01
Adamtsl4	2.09e-05	0.924709	0.141	0.083	0.391087	e01
Rerg	2.12e-05	0.391288	0.562	0.462	0.397024	e01
B3galt5	2.13e-05	0.59342	0.292	0.212	0.399073	e01
Caln1	2.17e-05	0.178252	0.785	0.685	0.405265	e01
Il22ra2	2.2e-05	0.748937	0.234	0.161	0.412346	e01
Sptb	2.22e-05	0.352078	0.514	0.419	0.414868	e01
Adamts8	2.29e-05	2.11399	0.024	0.006	0.428423	e01
Slc39a8	2.32e-05	1.10623	0.074	0.035	0.433483	e01
Tcfl5	2.32e-05	1.18988	0.057	0.024	0.434765	e01
Tacc2	2.33e-05	0.19667	0.981	0.936	0.435459	e01
Grm7	2.39e-05	0.129488	0.969	0.927	0.447386	e01
Atp6v0b	2.41e-05	0.201236	0.943	0.903	0.450218	e01
AABR07031740.1	2.44e-05	1.01119	0.134	0.078	0.45604	e01
Zcchc9	2.48e-05	0.240175	0.888	0.826	0.463818	e01
Tcp11x2	2.58e-05	1.79614	0.036	0.012	0.483238	e01
Syt6	2.63e-05	0.139996	0.273	0.185	0.491839	e01
AC126572.3	2.72e-05	0.548924	0.249	0.171	0.509542	e01
Sema4a	2.75e-05	0.277638	0.749	0.681	0.515062	e01
Syt10	2.81e-05	0.290372	0.268	0.185	0.525611	e01
Kif17	2.83e-05	0.504593	0.297	0.213	0.528797	e01
Sult2b1	2.87e-05	0.489334	0.337	0.251	0.536639	e01
Mb21d2	2.93e-05	0.446082	0.423	0.333	0.547172	e01
Ndufaf3	3.02e-05	0.611182	0.201	0.132	0.565132	e01
RGD1560775	3.08e-05	0.796825	0.148	0.09	0.575204	e01
Ccdc57	3.12e-05	0.213437	0.854	0.801	0.58288	e01
Megf8	3.13e-05	0.204376	0.856	0.797	0.58483	e01
Ppp1r14b	3.16e-05	0.286516	0.617	0.527	0.591335	e01
Zfp462	3.17e-05	0.414693	0.524	0.449	0.592599	e01
Aunip	3.21e-05	0.814612	0.098	0.051	0.599947	e01
Cadm2	3.22e-05	0.235537	0.787	0.692	0.601986	e01
Samd15	3.28e-05	0.541916	0.309	0.225	0.614331	e01
Ftcd	3.3e-05	0.860678	0.211	0.145	0.616487	e01
Ncoa3	3.34e-05	0.37289	0.605	0.531	0.623851	e01
Bag3	3.42e-05	1.12628	0.1	0.054	0.640487	e01
Pou2f2	3.48e-05	0.44185	0.445	0.349	0.650944	e01
Krt26	3.75e-05	0.688804	0.196	0.129	0.700487	e01
Epha10	3.84e-05	0.323504	0.526	0.433	0.718656	e01
Acpp	3.87e-05	2.7491	0.01	0.001	0.72306	e01
Shkbp1	3.9e-05	0.50208	0.297	0.216	0.729062	e01
Lmx1b	3.91e-05	2.25697	0.01	0.001	0.731043	e01
Tnnc2	3.93e-05	2.45496	0.01	0.001	0.734394	e01
Fam129c	3.99e-05	0.842393	0.158	0.098	0.746678	e01
Fbn1	4.05e-05	0.333394	0.514	0.416	0.756951	e01
Dapk1	4.05e-05	0.246122	0.797	0.706	0.758348	e01
Oxr1	4.12e-05	0.228278	0.969	0.947	0.770941	e01
Kalrn	4.45e-05	0.129702	0.988	0.971	0.831799	e01
AABR07072876.1	4.7e-05	2.08796	0.014	0.003	0.879871	e01
Gpr85	4.77e-05	0.383117	0.478	0.39	0.891258	e01
Commd4	4.87e-05	0.264989	0.73	0.645	0.910026	e01
Blvrb	4.91e-05	0.370543	0.577	0.495	0.918572	e01
Samd3	4.97e-05	0.880329	0.069	0.033	0.930132	e01
Lrrn2	5.04e-05	0.220984	0.732	0.667	0.943419	e01
Tial1	5.06e-05	0.258109	0.789	0.748	0.946501	e01
Pacsin1	5.21e-05	0.220808	0.804	0.72	0.974428	e01
AC117122.1	5.31e-05	0.609628	0.129	0.074	0.992218	e01
Pnkp	5.34e-05	0.327055	0.529	0.43	0.99953	e01
Cdh5	5.65e-05	1.55571	0.053	0.023	1	e01
Srrm1	5.73e-05	0.220486	0.892	0.826	1	e01
Rassf8	5.83e-05	0.535703	0.304	0.224	1	e01
Stpg1	6.48e-05	0.338821	0.443	0.355	1	e01
Plcd4	7.1e-05	0.712331	0.153	0.095	1	e01
FAM120C	7.16e-05	0.134112	0.962	0.92	1	e01
Igfbpl1	7.38e-05	0.672696	0.136	0.082	1	e01
Khdrbs2	7.38e-05	0.282241	0.866	0.827	1	e01
Usp20	7.88e-05	0.295717	0.624	0.552	1	e01
RGD1306556	8.03e-05	0.447051	0.407	0.322	1	e01
Hecw1	8.18e-05	0.158744	0.983	0.969	1	e01
Fezf1	8.29e-05	1.44389	0.057	0.026	1	e01
Atp8a1.1	8.29e-05	0.212169	0.95	0.927	1	e01
Btla	8.33e-05	0.853165	0.151	0.094	1	e01
Zfp398	8.48e-05	0.23781	0.823	0.772	1	e01
Gpr137c	8.62e-05	0.278317	0.758	0.676	1	e01
Ptprr	8.64e-05	0.274996	0.785	0.726	1	e01
Cdh9	8.7e-05	0.203145	0.407	0.305	1	e01
Pcp4	8.78e-05	0.483881	0.246	0.172	1	e01
Svopl	8.89e-05	1.41255	0.041	0.016	1	e01
Rin3	9.01e-05	0.615088	0.098	0.053	1	e01
AABR07034940.2	9.13e-05	1.25175	0.043	0.017	1	e01
Tmem175	9.25e-05	0.20655	0.856	0.771	1	e01
Gpr173	9.89e-05	0.452019	0.318	0.233	1	e01
Noc2l	9.97e-05	0.311544	0.61	0.528	1	e01
Rgs14	0.000101176	0.973032	0.086	0.045	1	e01
Rph3al	0.000102667	0.414847	0.153	0.094	1	e01
Spns1	0.000103469	0.236865	0.825	0.743	1	e01
AABR07063649.1	0.000104312	1.92973	0.024	0.007	1	e01
Zim1	0.000109056	0.375986	0.246	0.171	1	e01
Zfp57	0.000109421	0.436965	0.335	0.255	1	e01
Robo2	0.000111136	0.168373	0.854	0.762	1	e01
RGD1309139	0.000111302	0.570214	0.194	0.129	1	e01
Slc7a12	0.000112949	0.668376	0.196	0.134	1	e01
Ppp2r3a	0.000114071	0.184667	0.926	0.89	1	e01
Inpp5f	0.000114894	0.338708	0.596	0.521	1	e01
Drc1	0.0001149	0.241714	0.584	0.478	1	e01
Tubg2	0.000115191	0.446015	0.38	0.297	1	e01
Dnaaf3	0.000115283	1.05395	0.05	0.022	1	e01
Chst1	0.000116483	0.283224	0.706	0.638	1	e01
Mbd1	0.000117542	0.338855	0.634	0.549	1	e01
Alk	0.000117592	0.346728	0.627	0.555	1	e01
Cxxc4	0.000119048	0.323223	0.541	0.468	1	e01
Vsnl1	0.000119689	0.222954	0.83	0.779	1	e01
Snap91	0.000121088	0.15119	0.976	0.96	1	e01
Tfpi	0.000121309	0.728814	0.199	0.138	1	e01
AABR07071659.1	0.000121847	0.559169	0.268	0.192	1	e01
AABR07017745.4	0.000123542	1.54434	0.033	0.012	1	e01
Spag1	0.000125246	0.408974	0.388	0.308	1	e01
Nkx2-2	0.000126345	2.98657	0.01	0.002	1	e01
Cd80	0.000127279	0.661414	0.156	0.098	1	e01
Sdhaf1	0.000127796	0.654781	0.222	0.155	1	e01
Ror2	0.000132058	1.0278	0.089	0.047	1	e01
Gas2	0.000133834	0.30577	0.514	0.425	1	e01
Hrh3	0.000134174	0.37729	0.261	0.183	1	e01
Dlgap5	0.000137418	1.75487	0.043	0.018	1	e01
Ptgis	0.000140543	1.01809	0.069	0.034	1	e01
Ppp1r21	0.000140975	0.396599	0.411	0.327	1	e01
Nr3c2	0.000141135	0.276336	0.754	0.698	1	e01
Socs2	0.00014175	0.555932	0.208	0.142	1	e01
L1cam	0.000142245	0.232894	0.679	0.582	1	e01
Ajap1	0.000142587	0.309002	0.402	0.309	1	e01
Tmem233	0.000146658	1.60146	0.026	0.008	1	e01
Pabpn1	0.000147094	0.156239	0.974	0.963	1	e01
Phlpp2	0.000147322	0.208137	0.806	0.753	1	e01
Ros1	0.000147697	1.7498	0.036	0.014	1	e01
Tmcc3	0.00014804	0.600798	0.67	0.618	1	e01
Ahi1	0.000148262	0.122648	1	0.989	1	e01
LOC100911486	0.000151271	1.42017	0.031	0.011	1	e01
Dock9	0.000152521	0.1728	0.871	0.799	1	e01
Snrnp70	0.000156737	0.114727	1	0.989	1	e01
RGD1305587	0.000161917	0.355762	0.423	0.333	1	e01
Sh3kbp1	0.000164603	0.341704	0.749	0.699	1	e01
Rprm	0.000167873	1.21487	0.065	0.032	1	e01
Banp	0.000173052	0.271828	0.67	0.577	1	e01
AABR07052441.1	0.000175219	0.429321	0.38	0.3	1	e01
Ly6h	0.000175267	0.110934	0.993	0.957	1	e01
RGD1560034	0.000176397	0.510865	0.323	0.247	1	e01
Coq8b	0.000177799	0.267362	0.687	0.615	1	e01
Gltscr1l	0.000178055	0.270701	0.789	0.739	1	e01
Rps6kc1	0.000181982	0.221067	0.885	0.837	1	e01
Gfod1	0.000183816	0.342131	0.488	0.418	1	e01
Frmd3	0.000184249	0.182448	0.873	0.844	1	e01
Flt3	0.000185446	0.268413	0.49	0.393	1	e01
Chl1	0.000187592	0.2757	0.608	0.514	1	e01
RGD1561444	0.000187967	0.275912	0.629	0.558	1	e01
Ngb	0.00019063	0.862262	0.163	0.108	1	e01
Ift20	0.000194974	0.283344	0.598	0.517	1	e01
Vbp1	0.000195908	0.483197	0.33	0.254	1	e01
Traip	0.00019787	0.668817	0.112	0.066	1	e01
Fam189b	0.00019941	0.338674	0.495	0.411	1	e01
Mbnl2	0.000201656	0.146096	0.978	0.938	1	e01
LOC691519	0.00020726	1.7707	0.019	0.005	1	e01
Apob	0.00021116	3.00141	0.01	0.002	1	e01
AABR07051879.1	0.000213294	0.653932	0.27	0.202	1	e01
Cdkl1	0.000213978	0.282183	0.648	0.567	1	e01
Abhd14b	0.000215523	0.912639	0.122	0.074	1	e01
Setd4	0.000215624	0.255622	0.636	0.57	1	e01
Mterf4	0.000217292	0.572438	0.215	0.15	1	e01
Mid1	0.000219551	0.353834	0.328	0.244	1	e01
AABR07026483.1	0.000231692	0.276573	0.61	0.527	1	e01
Gml	0.000232582	1.80569	0.022	0.006	1	e01
Catip	0.000233176	0.46101	0.189	0.127	1	e01
Rn60-7-1033.1	0.000234721	1.09687	0.055	0.026	1	e01
Sgsm1	0.000237718	0.137216	0.928	0.911	1	e01
Parp16	0.000241353	0.529684	0.191	0.129	1	e01
Leng8	0.000250213	0.214998	0.821	0.746	1	e01
Prom1	0.000251624	1.68724	0.026	0.009	1	e01
Crocc	0.000257381	0.321742	0.495	0.413	1	e01
Sgpp2	0.000259218	0.333608	0.385	0.3	1	e01
LOC100364027	0.000259311	0.885213	0.062	0.03	1	e01
Naaa	0.000260706	0.65495	0.242	0.176	1	e01
Dpysl5	0.000265614	0.289814	0.641	0.564	1	e01
Spock1	0.000273254	0.25021	0.498	0.409	1	e01
Dgkg	0.000276409	0.15575	0.644	0.546	1	e01
Mei1	0.000279117	0.758653	0.1	0.058	1	e01
Wnt5b	0.000280389	1.34402	0.043	0.018	1	e01
Abca17	0.000280956	1.05232	0.096	0.055	1	e01
Mtcl1	0.000282657	0.277829	0.577	0.497	1	e01
RGD1560883	0.000285419	0.181339	0.962	0.95	1	e01
Ush2a	0.000286389	0.979794	0.062	0.03	1	e01
Spint2	0.00028644	0.285942	0.5	0.416	1	e01
Tas1r2	0.000289872	0.396626	0.481	0.398	1	e01
Ankrd23	0.000291834	2.12483	0.017	0.004	1	e01
Kifc2	0.000292707	0.27245	0.766	0.698	1	e01
Nek7	0.000300412	0.633972	0.158	0.103	1	e01
Syt7	0.000303139	0.241023	0.498	0.411	1	e01
Sergef	0.000307482	0.196215	0.842	0.791	1	e01
AABR07041411.1	0.000313017	0.280148	0.44	0.353	1	e01
Pik3r5	0.000315595	0.766166	0.086	0.047	1	e01
Mboat1	0.00031864	0.689245	0.11	0.065	1	e01
Cnr1	0.000319241	0.242973	0.467	0.372	1	e01
AABR07000261.1	0.000322165	2.32253	0.012	0.002	1	e01
Arrdc1	0.00032655	0.594874	0.146	0.093	1	e01
Padi4	0.000333341	3.27332	0.01	0.002	1	e01
Cmip	0.00033566	0.140966	0.988	0.965	1	e01
Pax7	0.000340526	3.00357	0.01	0.002	1	e01
Lpin3	0.000341758	0.536947	0.287	0.219	1	e01
Tmem179	0.000341777	0.253906	0.737	0.661	1	e01
Nptxr	0.000342589	0.196174	0.512	0.429	1	e01
Sh2d3c	0.000344975	0.402591	0.323	0.25	1	e01
Xkr4	0.000345356	0.108509	0.995	0.984	1	e01
Galntl6	0.000348618	0.346347	0.526	0.457	1	e01
Rps19bp1	0.000353655	0.425147	0.316	0.24	1	e01
Pprc1	0.000357715	0.373046	0.294	0.221	1	e01
Lmntd1	0.000360632	0.685444	0.132	0.083	1	e01
Cyp19a1	0.000365583	1.22492	0.036	0.014	1	e01
Zfp483	0.00037197	0.213726	0.751	0.688	1	e01
Tspan14	0.000373502	0.451173	0.261	0.191	1	e01
Ssc5d	0.000375012	0.686236	0.172	0.117	1	e01
Gabrr3	0.000378932	1.29697	0.041	0.017	1	e01
Cchcr1	0.000382524	0.749995	0.127	0.079	1	e01
Stk33	0.000383013	0.882989	0.12	0.074	1	e01
Lgi3	0.000386794	0.237349	0.636	0.553	1	e01
Armc9	0.000391016	0.185856	0.9	0.867	1	e01
Ocel1	0.000404237	0.767835	0.098	0.057	1	e01
Pnpla3	0.000408824	0.574691	0.211	0.148	1	e01
Foxp4	0.000413919	0.420969	0.278	0.208	1	e01
Ceacam1	0.000423121	0.812751	0.105	0.062	1	e01
Dcaf4	0.000426695	0.44202	0.294	0.223	1	e01
Mki67	0.000432749	0.703157	0.093	0.053	1	e01
Nrp1	0.00043326	0.268881	0.687	0.575	1	e01
Erc2	0.000441665	0.176138	0.923	0.883	1	e01
Gramd4	0.000444264	0.312162	0.548	0.477	1	e01
AABR07062512.1	0.000448077	0.643707	0.136	0.087	1	e01
Rpgrip1l	0.000454649	0.18636	0.878	0.84	1	e01
Styk1	0.000458538	1.37026	0.041	0.017	1	e01
Ptk2b	0.000458841	0.274302	0.22	0.154	1	e01
Pnpla6	0.00046245	0.285188	0.545	0.46	1	e01
ENSRNOG00000035079	0.000462536	1.47655	0.038	0.016	1	e01
Plcxd3	0.000470003	0.28078	0.701	0.63	1	e01
RGD1563365	0.000472545	0.505725	0.203	0.143	1	e01
Trappc5	0.000479218	0.544704	0.261	0.193	1	e01
Mn1	0.000484122	0.678297	0.117	0.071	1	e01
Ccdc27	0.000486128	1.37518	0.036	0.015	1	e01
Nptx1	0.000488861	0.45682	0.287	0.22	1	e01
LOC103690137	0.000499451	1.17598	0.053	0.025	1	e01
Ankar	0.000501817	0.614207	0.196	0.138	1	e01
Mug2	0.000505747	2.16478	0.014	0.004	1	e01
AABR07050466.1	0.000519306	1.24701	0.024	0.008	1	e01
Ptrf	0.000525427	1.6375	0.022	0.007	1	e01
AABR07042542.1	0.000526571	2.47815	0.01	0.002	1	e01
Ankrd66	0.000528783	2.41649	0.01	0.002	1	e01
Osbpl6	0.000530462	0.13358	0.868	0.817	1	e01
Trib3	0.000535576	0.943468	0.062	0.031	1	e01
Hpse	0.000538268	1.41307	0.038	0.016	1	e01
Lgals3bp	0.000555229	0.746733	0.124	0.078	1	e01
Rpl37a	0.000555665	0.261222	0.584	0.509	1	e01
Tulp4	0.000558044	0.221631	0.83	0.809	1	e01
Dhcr24	0.000559579	0.263039	0.615	0.555	1	e01
Deaf1	0.000566466	0.276918	0.569	0.499	1	e01
Pcsk4	0.000573115	1.11593	0.081	0.045	1	e01
Adap1	0.000575426	0.257545	0.605	0.519	1	e01
Sytl1	0.000576379	1.39754	0.024	0.008	1	e01
Cdk10	0.000577124	0.159376	0.854	0.807	1	e01
Smr3b	0.000581616	0.997599	0.108	0.066	1	e01
Emc9	0.000583447	0.350114	0.421	0.343	1	e01
Igtp	0.000595601	1.66545	0.05	0.024	1	e01
Rnf112	0.000601795	0.235702	0.615	0.521	1	e01
Bmp6	0.000603896	0.387087	0.49	0.424	1	e01
AABR07043429.2	0.000604077	2.45563	0.012	0.003	1	e01
Parp9	0.000610972	0.919727	0.074	0.04	1	e01
Zswim4	0.000634119	0.435903	0.419	0.345	1	e01
Srebf2	0.000644103	0.169789	0.868	0.81	1	e01
AABR07001929.1	0.000645319	0.586188	0.189	0.133	1	e01
Amotl1	0.000646195	0.303195	0.44	0.356	1	e01
Iqca1	0.000656046	0.695597	0.182	0.126	1	e01
Fam159a	0.000665958	1.1616	0.029	0.011	1	e01
Col13a1	0.000681724	1.92225	0.022	0.007	1	e01
Pvt1	0.000685948	0.374608	0.378	0.301	1	e01
Mapre2	0.000696105	0.338294	0.273	0.203	1	e01
Dnajc5b	0.000699914	0.7234	0.098	0.058	1	e01
Echdc1	0.000713691	0.691472	0.156	0.105	1	e01
Cacna1h	0.000718272	0.449655	0.275	0.208	1	e01
Micu3	0.000772308	0.157562	0.844	0.809	1	e01
Lepr	0.000778819	0.416829	0.244	0.178	1	e01
Arhgef17	0.000782004	0.334313	0.486	0.41	1	e01
Slitrk1	0.000782523	0.212428	0.452	0.371	1	e01
LOC360479	0.000788161	0.773771	0.127	0.081	1	e01
Tbc1d1	0.000790135	0.21332	0.648	0.574	1	e01
Pmepa1	0.000803651	0.472755	0.222	0.164	1	e01
Csad	0.000810166	0.639145	0.136	0.089	1	e01
Ngp	0.000815782	2.00575	0.017	0.005	1	e01
Nipal1	0.000815987	1.98563	0.014	0.004	1	e01
Cfap77	0.000823084	1.61542	0.022	0.007	1	e01
Tnks	0.00083552	0.181028	0.864	0.812	1	e01
AABR07015812.2	0.000853511	0.597236	0.167	0.115	1	e01
Slc7a3	0.000854183	0.3507	0.354	0.281	1	e01
Asic2	0.00087386	0.14719	0.9	0.831	1	e01
LOC100912181	0.000875374	0.415537	0.316	0.245	1	e01
Hck	0.000877738	1.51694	0.031	0.012	1	e01
Phpt1	0.000884614	0.454955	0.244	0.181	1	e01
Oasl	0.000902586	0.985646	0.081	0.047	1	e01
Sesn1	0.000923325	0.22647	0.629	0.552	1	e01
Pth2r	0.000927047	0.846719	0.098	0.059	1	e01
Tusc3	0.000935069	0.171195	0.873	0.819	1	e01
Ralgapa2	0.000947953	0.182231	0.825	0.77	1	e01
Nphp1	0.000948771	0.34271	0.507	0.437	1	e01
LOC108348172	0.000948994	0.150742	0.84	0.781	1	e01
Sh2d6	0.000959499	0.926746	0.067	0.036	1	e01
Dopey2	0.000968259	0.268458	0.701	0.635	1	e01
F8a1	0.000976988	0.606329	0.146	0.098	1	e01
Ccnjl	0.000979283	1.00319	0.069	0.038	1	e01
Gfod2	0.000979714	0.2446	0.644	0.575	1	e01
Sh3gl1	0.000985564	0.262394	0.615	0.553	1	e01
Usp22	0.00098612	0.216158	0.849	0.799	1	e01
AABR07057648.1	0.000991168	1.92256	0.019	0.006	1	e01
Wdr63	0.000999232	0.582343	0.086	0.05	1	e01
Suclg2	0.00100478	0.309552	0.409	0.342	1	e01
Pdzd11	0.00100524	0.530808	0.289	0.23	1	e01
Lrrc75b	0.00101083	0.42841	0.211	0.151	1	e01
LOC500035	0.00102428	2.06706	0.014	0.004	1	e01
Cdkl2	0.00102515	0.391096	0.407	0.338	1	e01
Ccdc187	0.00102706	0.878752	0.045	0.021	1	e01
Foxg1	0.00103049	0.615342	0.108	0.066	1	e01
Mroh2a	0.00104107	0.814975	0.1	0.062	1	e01
Tomm40	0.001057	0.80515	0.117	0.075	1	e01
Ankrd26	0.00106687	0.178111	0.711	0.636	1	e01
Rnf207	0.00107293	0.429291	0.297	0.227	1	e01
Lrrc74b	0.00107781	1.06912	0.067	0.036	1	e01
Fxyd5	0.00110585	1.32011	0.031	0.013	1	e01
Dedd2	0.0011064	0.731823	0.079	0.045	1	e01
Siah3	0.00111306	0.597782	0.222	0.165	1	e01
Pigl	0.00112516	0.298389	0.622	0.56	1	e01
NEWGENE-1582994	0.00112976	2.62061	0.01	0.002	1	e01
Dmc1	0.00113876	0.246804	0.467	0.386	1	e01
Ptbp2	0.0011388	0.139403	0.907	0.88	1	e01
Tmem205	0.00114645	0.512012	0.227	0.171	1	e01
Stx1a	0.00114796	0.365439	0.438	0.367	1	e01
Nckap5	0.00115171	0.295143	0.512	0.424	1	e01
Ak4	0.00115579	0.527005	0.179	0.125	1	e01
Klhl29	0.00115956	0.114862	0.952	0.906	1	e01
Clu	0.0011652	0.169834	0.691	0.585	1	e01
Flnb	0.00117245	0.188995	0.811	0.751	1	e01
AABR07047221.1	0.00117793	0.203916	0.636	0.564	1	e01
Rbm24	0.00118199	0.532732	0.175	0.123	1	e01
Palm3	0.0011957	0.899093	0.098	0.06	1	e01
Yaf2	0.00120909	0.223475	0.696	0.623	1	e01
Brf2	0.00122949	0.459986	0.289	0.23	1	e01
Zdhhc23	0.00123635	0.375073	0.215	0.155	1	e01
Col12a1	0.00123875	0.642065	0.136	0.089	1	e01
Recql5	0.0012447	0.473849	0.378	0.316	1	e01
Iqce	0.00125326	0.184522	0.794	0.757	1	e01
AABR07057322.1	0.00125582	2.03504	0.014	0.004	1	e01
Snx32	0.00128685	0.385108	0.373	0.308	1	e01
AABR07033720.1	0.0012917	0.160128	0.94	0.865	1	e01
Scaper	0.0012917	0.128365	0.943	0.928	1	e01
Cntnap4	0.00129371	0.180516	0.677	0.609	1	e01
Nup210l	0.00131015	0.507318	0.158	0.108	1	e01
Slc38a6	0.00132994	0.275085	0.519	0.458	1	e01
Cryga	0.00134532	0.806823	0.091	0.054	1	e01
Ocrl	0.00134535	0.22186	0.646	0.594	1	e01
Slc22a17	0.00134908	0.124326	0.959	0.929	1	e01
Pnma3	0.00135386	0.338065	0.344	0.272	1	e01
Mov10	0.00137864	0.303841	0.445	0.368	1	e01
Pold4	0.001379	1.04694	0.067	0.037	1	e01
Rab30	0.00138057	0.200253	0.711	0.655	1	e01
Rab36	0.00140375	0.199756	0.761	0.715	1	e01
Ctnna2	0.00142098	0.29876	0.526	0.455	1	e01
Micu1	0.00142523	0.133885	0.768	0.704	1	e01
Ttll13	0.00143758	0.430286	0.22	0.162	1	e01
Csf1	0.00145624	0.558327	0.153	0.106	1	e01
Kcnab2	0.00145855	0.241279	0.615	0.552	1	e01
AABR07021730.1	0.00146448	1.65054	0.026	0.01	1	e01
Col8a1	0.0014672	0.207492	0.151	0.101	1	e01
Ndrg1	0.00146867	0.473672	0.179	0.126	1	e01
Psmg3	0.00147718	0.486819	0.22	0.165	1	e01
Dkc1	0.00149004	0.287336	0.553	0.481	1	e01
AABR07049389.1	0.00149852	0.784946	0.074	0.042	1	e01
LOC102554838	0.00149896	1.57016	0.033	0.014	1	e01
Cep89	0.00151652	0.300211	0.45	0.38	1	e01
Adh1	0.0015225	0.777108	0.093	0.056	1	e01
AABR07022039.1	0.00152582	1.25597	0.026	0.01	1	e01
LOC681766	0.00153126	0.815453	0.12	0.078	1	e01
Erich5	0.00153602	2.06257	0.014	0.004	1	e01
AABR07059009.2	0.00153875	1.89358	0.014	0.004	1	e01
Vps13a	0.00154264	0.187584	0.773	0.73	1	e01
AABR07033925.1	0.00154291	1.22015	0.041	0.019	1	e01
Gltpd2	0.00154615	0.774438	0.12	0.078	1	e01
Ttyh3	0.00155849	0.222287	0.687	0.622	1	e01
Acrv1	0.00156016	1.8095	0.019	0.006	1	e01
Mab21l3	0.00156589	3.12671	0.01	0.002	1	e01
Meox1	0.00157812	1.3631	0.014	0.004	1	e01
Rbfox3	0.00157851	0.271158	0.392	0.319	1	e01
Pigy	0.00158944	1.0028	0.043	0.02	1	e01
LOC100911776	0.00160248	2.10747	0.01	0.002	1	e01
Abca3	0.00161348	0.228472	0.739	0.705	1	e01
Wbscr17	0.00161979	0.141539	0.873	0.802	1	e01
Actn4	0.00164374	0.151579	0.66	0.591	1	e01
Lancl1	0.00164927	0.236472	0.617	0.556	1	e01
Glt8d2	0.00164936	0.697605	0.098	0.06	1	e01
Vom2r53	0.00165153	1.00999	0.048	0.024	1	e01
Ctnna1	0.00167103	0.300071	0.433	0.358	1	e01
Pkn1	0.00167675	0.191515	0.684	0.629	1	e01
Stk31	0.00168529	2.09692	0.017	0.005	1	e01
Ap3s2	0.00170165	0.254073	0.553	0.469	1	e01
Pxmp4	0.0017437	0.434004	0.294	0.236	1	e01
Lrch1	0.00177068	0.245642	0.78	0.728	1	e01
Ms4a8	0.00178248	1.83549	0.019	0.006	1	e01
Scin	0.00181789	1.44122	0.029	0.012	1	e01
Fem1a	0.00182545	0.255195	0.545	0.467	1	e01
AABR07033921.1	0.00184658	1.00937	0.038	0.017	1	e01
Nenf	0.00184895	0.346001	0.5	0.45	1	e01
Pgp	0.00187733	0.324569	0.378	0.311	1	e01
Mcu	0.00190662	0.171742	0.577	0.475	1	e01
Cep164	0.0019084	0.194906	0.679	0.601	1	e01
Mterf1	0.00191211	0.318028	0.325	0.256	1	e01
Plppr3	0.00195625	0.26224	0.644	0.593	1	e01
Ssh3	0.00200213	0.360582	0.421	0.361	1	e01
Fam172a	0.00201498	0.163009	0.849	0.814	1	e01
Pced1a	0.00204482	0.23358	0.586	0.533	1	e01
AABR07013488.2	0.0020821	0.739579	0.065	0.036	1	e01
Brca2	0.00210276	0.374069	0.218	0.16	1	e01
Crmp1	0.00212963	0.252782	0.548	0.484	1	e01
Hbs1l	0.00214985	0.22381	0.734	0.676	1	e01
Prx	0.00216549	2.47963	0.01	0.002	1	e01
Arhgap44	0.00216728	0.12012	0.868	0.845	1	e01
Nadsyn1	0.00217717	0.501241	0.187	0.136	1	e01
Rtn3	0.0021772	0.104274	0.988	0.976	1	e01
Copg2	0.00218448	0.120772	0.904	0.876	1	e01
Wdr17	0.00219404	0.351182	0.469	0.404	1	e01
AABR07041418.1	0.00221644	0.254953	0.44	0.367	1	e01
Abcc9	0.00223022	1.04656	0.026	0.01	1	e01
Tspan18	0.0022314	0.402818	0.211	0.154	1	e01
Trim54	0.00224166	2.21145	0.014	0.004	1	e01
Gtf2h1	0.00224333	0.263301	0.608	0.537	1	e01
Areg	0.00224717	2.00268	0.017	0.005	1	e01
AC110488.1	0.00225507	0.425554	0.234	0.18	1	e01
AABR07001942.1	0.00227935	0.229628	0.455	0.38	1	e01
LOC100362054	0.00228095	1.74627	0.026	0.011	1	e01
Nme3	0.00229157	0.387846	0.378	0.315	1	e01
Lman2l	0.0023054	0.251319	0.641	0.568	1	e01
Ptprh	0.0023085	0.87289	0.043	0.021	1	e01
Rtn4r	0.00231707	0.760772	0.112	0.074	1	e01
Hsph1	0.00234084	0.217773	0.648	0.59	1	e01
Bpifa1	0.00236027	1.37224	0.017	0.005	1	e01
Dmtn	0.00239098	0.214277	0.646	0.577	1	e01
Rpl22	0.0023925	0.27669	0.486	0.424	1	e01
RGD1562310	0.00239262	0.263532	0.495	0.426	1	e01
LOC691311	0.00240728	1.21113	0.031	0.013	1	e01
Zfp444	0.00241115	0.331226	0.438	0.371	1	e01
Nipsnap3b	0.00241225	0.468185	0.203	0.15	1	e01
Slc16a11	0.00244852	0.268004	0.56	0.484	1	e01
Agap1	0.0024654	0.12786	0.974	0.937	1	e01
Asphd1	0.00249914	0.349831	0.402	0.338	1	e01
Baiap2	0.00252906	0.143769	0.519	0.435	1	e01
LOC500956	0.00255903	0.263504	0.548	0.494	1	e01
Setd6	0.00258161	0.678038	0.112	0.074	1	e01
Limd2	0.00260125	0.464037	0.179	0.129	1	e01
Stk38	0.00261406	0.192189	0.797	0.768	1	e01
Ckmt1	0.00261539	0.323358	0.488	0.424	1	e01
Npl	0.00262153	0.407896	0.289	0.233	1	e01
Galnt11	0.00263002	0.238911	0.598	0.538	1	e01
Rrs1	0.00264444	0.762679	0.144	0.101	1	e01
AABR07042733.1	0.00265595	0.509912	0.196	0.146	1	e01
Fam234b	0.00265842	0.328775	0.392	0.334	1	e01
Acbd6	0.00267892	0.133411	0.933	0.912	1	e01
RGD1310209	0.00267901	0.201277	0.706	0.644	1	e01
AABR07058658.1	0.00268448	0.71545	0.072	0.042	1	e01
LOC100362814	0.00269009	0.255301	0.543	0.48	1	e01
Myh2	0.002696	1.7087	0.014	0.004	1	e01
LOC361985	0.00270001	0.212552	0.629	0.555	1	e01
Dnah2	0.00270107	0.49994	0.179	0.13	1	e01
Acot11	0.00271128	0.619994	0.141	0.097	1	e01
Xrcc4	0.00272749	0.25093	0.565	0.506	1	e01
Trps1	0.002734	0.436722	0.713	0.683	1	e01
Kynu	0.00277019	1.4426	0.014	0.004	1	e01
Stx2	0.00278039	0.38546	0.321	0.263	1	e01
Prmt9	0.00280476	0.417514	0.371	0.314	1	e01
Dcdc2	0.00280744	0.884104	0.098	0.062	1	e01
Kcnn3	0.00281238	0.167028	0.632	0.541	1	e01
Epb41	0.00281315	0.164775	0.708	0.632	1	e01
Rasip1	0.00281499	0.530704	0.139	0.095	1	e01
Rhpn1	0.00281686	1.02194	0.081	0.049	1	e01
Efcab12	0.00281827	1.08138	0.036	0.017	1	e01
Phf11b	0.00282647	0.497842	0.151	0.105	1	e01
Suv39h1l1	0.00283709	0.593085	0.115	0.076	1	e01
Cyb561	0.00286113	0.296042	0.438	0.369	1	e01
Pcdh20	0.00287318	0.375909	0.201	0.147	1	e01
Hipk4	0.00288019	0.682305	0.134	0.092	1	e01
Esyt3	0.00288287	0.501156	0.199	0.148	1	e01
AABR07031931.1	0.00290829	2.41721	0.01	0.002	1	e01
Tspan17	0.00290881	0.364091	0.304	0.239	1	e01
AABR07043667.1	0.00291316	1.23368	0.024	0.009	1	e01
Plin5	0.00291641	2.2489	0.01	0.002	1	e01
LOC100909912	0.00292693	0.549201	0.182	0.131	1	e01
Pdzd4	0.0029448	0.15545	0.644	0.567	1	e01
Nkain4	0.00295052	0.499319	0.072	0.041	1	e01
Pof1b	0.00295897	1.91624	0.01	0.002	1	e01
Abcb1a	0.00296285	0.331966	0.388	0.326	1	e01
Plekhg6	0.0029691	0.738649	0.127	0.086	1	e01
Caskin1	0.00297412	0.207002	0.622	0.554	1	e01
Sox11	0.00297924	0.671962	0.096	0.06	1	e01
Hsd11b2	0.00299494	2.0877	0.017	0.005	1	e01
Naip6	0.0030066	0.484605	0.16	0.112	1	e01
Dbn1	0.00302397	0.177032	0.775	0.715	1	e01
Ica1l	0.00304029	0.224218	0.663	0.595	1	e01
Ier3ip1	0.00304069	2.18676	0.017	0.005	1	e01
Jdp2	0.0030463	0.240712	0.541	0.485	1	e01
Fbxo2	0.00304933	0.674639	0.144	0.1	1	e01
Plekha7	0.00305501	0.190009	0.507	0.435	1	e01
Htr1b	0.00310273	1.55044	0.019	0.007	1	e01
Pemt	0.00311473	0.506162	0.172	0.123	1	e01
Slc7a6	0.00312564	0.224476	0.524	0.453	1	e01
Dis3l2	0.00313	0.156896	0.907	0.861	1	e01
Kcnc3	0.00313925	0.231847	0.739	0.689	1	e01
Bcl2l11	0.00315175	1.42262	0.045	0.023	1	e01
Lamp5	0.00315502	0.44989	0.098	0.062	1	e01
Lrif1	0.0031573	0.148379	0.751	0.709	1	e01
Sdpr	0.00315944	0.496246	0.108	0.069	1	e01
Sez6l2	0.00316015	0.120103	0.888	0.844	1	e01
Msrb3	0.0031742	0.312652	0.342	0.282	1	e01
Acap2	0.00318894	0.143335	0.811	0.756	1	e01
Stim2	0.00319165	0.160817	0.636	0.571	1	e01
Efcab11	0.00320889	1.50679	0.031	0.014	1	e01
ENSRNOG00000001825	0.00321333	0.479548	0.167	0.12	1	e01
Osbpl5	0.00321456	0.420957	0.285	0.229	1	e01
Slc50a1	0.00322149	0.398649	0.356	0.3	1	e01
AABR07066529.3	0.00328613	0.759987	0.086	0.054	1	e01
Map2k4	0.00332493	0.128646	0.938	0.924	1	e01
Bok	0.00333593	0.316528	0.203	0.148	1	e01
AABR07071697.1	0.00335918	0.294353	0.321	0.255	1	e01
Spag6	0.0033813	1.46223	0.026	0.011	1	e01
Sumf2	0.00338619	0.493082	0.191	0.142	1	e01
Cenpm	0.0033923	0.866476	0.055	0.03	1	e01
Actn1	0.0033977	0.264107	0.622	0.57	1	e01
H2afj	0.0034027	0.832331	0.048	0.025	1	e01
Nckipsd	0.00342196	0.40753	0.289	0.23	1	e01
Lrp3	0.00342432	0.295423	0.299	0.237	1	e01
Nt5dc1	0.00342727	0.213581	0.531	0.468	1	e01
Erlin2	0.00343838	0.447687	0.244	0.19	1	e01
Cyp2b12	0.00345155	0.587627	0.1	0.064	1	e01
Ylpm1	0.00346175	0.116264	0.938	0.933	1	e01
Zfp322a	0.00346721	0.220858	0.533	0.46	1	e01
Glrx5	0.00347761	0.385916	0.167	0.12	1	e01
Bsn	0.00349735	0.214555	0.773	0.736	1	e01
RGD1565498	0.00351025	0.832546	0.093	0.059	1	e01
Clvs1	0.00352333	0.152973	0.648	0.575	1	e01
Gpr88	0.00354522	0.602757	0.127	0.086	1	e01
Il4r	0.00359215	0.63561	0.134	0.092	1	e01
Map3k10	0.00362006	0.234368	0.581	0.507	1	e01
Nectin3	0.0036306	0.335119	0.344	0.284	1	e01
Cdc42ep3	0.00363113	0.259685	0.333	0.269	1	e01
Rnd3	0.00366658	0.201659	0.459	0.389	1	e01
Nxnl2	0.00371441	1.04509	0.053	0.028	1	e01
Ptpro	0.00375719	0.124124	0.722	0.656	1	e01
AABR07037343.1	0.00379302	0.967594	0.084	0.052	1	e01
Spata9	0.00379415	0.513377	0.134	0.092	1	e01
Sdr39u1	0.00379734	0.695799	0.163	0.119	1	e01
Nosip	0.0038443	0.332537	0.301	0.242	1	e01
Polr3a	0.00386635	0.47312	0.218	0.167	1	e01
Stk32a	0.00387198	0.162336	0.22	0.162	1	e01
Tbl3	0.00387757	0.915895	0.067	0.039	1	e01
LOC100912849	0.00388711	1.63674	0.01	0.002	1	e01
Tbc1d14	0.00390472	0.258382	0.51	0.451	1	e01
Urgcp	0.00391284	0.192849	0.567	0.502	1	e01
Resp18	0.00393399	0.127956	0.926	0.892	1	e01
Klhdc10	0.00394411	0.120604	0.945	0.937	1	e01
Asb12	0.0039546	0.83232	0.065	0.037	1	e01
Edc3	0.00396325	0.347986	0.481	0.428	1	e01
Atl1	0.00399369	0.1467	0.9	0.87	1	e01
Nip7	0.0040289	0.47273	0.179	0.131	1	e01
Myo5b	0.00404771	0.405298	0.268	0.21	1	e01
Slitrk5	0.00405884	0.412125	0.321	0.265	1	e01
Zwilch	0.00412054	0.607371	0.115	0.077	1	e01
Spata32	0.00412789	0.69427	0.089	0.055	1	e01
AABR07070046.1	0.00413245	0.143331	0.935	0.895	1	e01
AABR07057421.2	0.0041495	0.440222	0.153	0.108	1	e01
Gtf3c1	0.00415863	0.124058	0.804	0.73	1	e01
Il10rb	0.00418371	1.22009	0.067	0.04	1	e01
Capn7	0.00421748	0.129918	0.727	0.649	1	e01
Atpaf2	0.0042459	0.210804	0.438	0.366	1	e01
Kcnip3	0.00425189	0.355438	0.208	0.156	1	e01
Syt9	0.00426797	0.304015	0.356	0.297	1	e01
Crp	0.0042804	1.82401	0.012	0.003	1	e01
Vps33b	0.00431929	0.28765	0.361	0.302	1	e01
Fam193b	0.00432537	0.165249	0.837	0.799	1	e01
Adamts15	0.00432659	1.15289	0.053	0.029	1	e01
Syt3	0.00435531	0.269985	0.596	0.54	1	e01
Grpr	0.00437401	0.89228	0.041	0.02	1	e01
Afm	0.00439493	1.60239	0.019	0.007	1	e01
Lmtk3	0.00443493	0.226399	0.512	0.45	1	e01
Hdac11	0.00443523	0.224038	0.629	0.573	1	e01
Dnpep	0.00444579	0.21421	0.581	0.509	1	e01
Mpp5	0.00444678	0.230003	0.67	0.618	1	e01
Spop	0.00449121	0.147757	0.868	0.811	1	e01
Mchr1	0.00451325	0.562599	0.158	0.113	1	e01
Ext1	0.00453495	0.201892	0.849	0.823	1	e01
Sdhaf2	0.00459603	0.289639	0.4	0.337	1	e01
Wbscr28	0.00467424	0.839534	0.072	0.043	1	e01
Cd6	0.00469831	1.26802	0.041	0.02	1	e01
RGD1560324	0.00470543	0.722893	0.084	0.053	1	e01
Abcg5	0.00470562	0.996051	0.041	0.02	1	e01
AC096473.3	0.00471574	0.202879	0.5	0.435	1	e01
Car11	0.00479716	0.140269	0.811	0.748	1	e01
Kcnb1	0.00480256	0.196117	0.612	0.548	1	e01
Rnf181	0.0048266	0.534425	0.201	0.152	1	e01
Krt25	0.00488646	1.24643	0.022	0.008	1	e01
Strada	0.00488921	0.213046	0.675	0.631	1	e01
Mov10l1	0.00488996	0.745844	0.112	0.076	1	e01
AABR07027190.2	0.00489703	2.53063	0.01	0.002	1	e01
Plin3	0.00489718	1.1506	0.038	0.019	1	e01
Stx7	0.0048979	0.185012	0.474	0.412	1	e01
AABR07060769.1	0.00493208	1.26547	0.022	0.008	1	e01
Ipo11	0.00493861	0.149868	0.885	0.846	1	e01
AABR07037104.1	0.00494001	2.20467	0.01	0.002	1	e01
Asap3	0.0049414	1.29009	0.038	0.019	1	e01
Ssna1	0.00496439	0.559378	0.11	0.073	1	e01
Unc13b	0.00500056	0.442147	0.469	0.411	1	e01
Gramd1a	0.00501369	0.186385	0.584	0.527	1	e01
Snap29	0.00502755	0.296803	0.373	0.31	1	e01
Asmt	0.00503842	0.982479	0.038	0.019	1	e01
Tmem232	0.00504742	0.8177	0.045	0.024	1	e01
Cd55	0.00505165	0.406767	0.136	0.095	1	e01
Cdh22	0.00508365	0.416734	0.234	0.18	1	e01
AABR07027870.1	0.00509113	2.1083	0.012	0.003	1	e01
Nol4	0.00511494	0.212337	0.883	0.858	1	e01
Fntb	0.0051262	0.337575	0.411	0.358	1	e01
Cmtm3	0.00514124	1.47491	0.026	0.011	1	e01
Mtmr1	0.00516962	0.261461	0.476	0.417	1	e01
Ccdc62	0.00517663	0.121947	0.842	0.784	1	e01
Mvp	0.00519798	0.23912	0.49	0.42	1	e01
Nradd	0.00520643	0.575216	0.117	0.08	1	e01
Hspa2	0.00521271	1.46429	0.014	0.005	1	e01
Aldh1l2	0.00521755	0.684081	0.098	0.064	1	e01
Ralgps2	0.00527055	0.137916	0.797	0.751	1	e01
Clvs2	0.00527405	0.148095	0.797	0.744	1	e01
Cops8	0.00531874	0.331591	0.251	0.197	1	e01
Ppp1r42	0.00532425	1.27715	0.043	0.022	1	e01
Ndufa9	0.00533291	0.183222	0.608	0.553	1	e01
Wipf3	0.00535756	0.659826	0.222	0.173	1	e01
Izumo4	0.00538852	0.908667	0.069	0.042	1	e01
Gatc	0.00539382	0.330666	0.356	0.301	1	e01
Arhgef28	0.00541607	0.134709	0.512	0.429	1	e01
Trafd1	0.00544792	0.221808	0.627	0.568	1	e01
Rasa2	0.0055102	0.150643	0.792	0.75	1	e01
Mos	0.0055276	1.55407	0.019	0.007	1	e01
Gstz1	0.00553692	0.509848	0.244	0.195	1	e01
Nova2	0.0055377	0.208059	0.55	0.493	1	e01
AABR07025986.1	0.00557339	0.7158	0.115	0.079	1	e01
AABR07001905.1	0.00561521	0.436801	0.184	0.137	1	e01
Pop5	0.00562616	0.662447	0.091	0.059	1	e01
Camta1	0.00564228	0.10143	0.99	0.979	1	e01
Pelp1	0.00564272	0.330513	0.361	0.305	1	e01
Mtch1	0.00566067	0.144334	0.809	0.765	1	e01
Sord	0.00566261	0.253887	0.481	0.411	1	e01
Spock3	0.0056688	0.216595	0.919	0.877	1	e01
LOC499240	0.00569275	1.15198	0.043	0.022	1	e01
Myl7	0.00582517	0.919403	0.048	0.026	1	e01
Unc45a	0.00583237	0.297017	0.423	0.369	1	e01
Larp7	0.00584935	0.475271	0.182	0.137	1	e01
Cfap43	0.00586663	1.25271	0.048	0.026	1	e01
Spag8	0.00587964	0.738026	0.067	0.04	1	e01
RGD1566368	0.00588459	0.984083	0.045	0.024	1	e01
AABR07067885.1	0.00590488	1.06721	0.038	0.019	1	e01
Lrch2	0.00590694	0.278783	0.45	0.39	1	e01
Stk25	0.00591129	0.174895	0.541	0.478	1	e01
Zfp202	0.00592308	0.305664	0.395	0.335	1	e01
Clec4m	0.00595723	1.01258	0.031	0.014	1	e01
Zc3h6	0.00596766	0.185402	0.694	0.632	1	e01
Zpbp2	0.00598955	0.833556	0.06	0.035	1	e01
Kazn	0.00601435	0.221465	0.522	0.467	1	e01
Lmbrd2	0.00603442	0.273496	0.411	0.348	1	e01
Zfp791	0.00608355	0.521804	0.124	0.086	1	e01
Ets1	0.00609018	1.32987	0.041	0.021	1	e01
Fyco1	0.00609751	0.506291	0.115	0.078	1	e01
tGap1	0.00616404	1.86912	0.012	0.004	1	e01
NEWGENE-1308612	0.00626557	0.378432	0.419	0.361	1	e01
Oasl2	0.00627282	0.760673	0.065	0.038	1	e01
Lhpp	0.00627751	0.451793	0.268	0.221	1	e01
Slc4a1ap	0.00632805	0.239732	0.593	0.544	1	e01
Anxa11	0.00635696	0.815805	0.103	0.069	1	e01
Kif27	0.0063618	0.223943	0.361	0.303	1	e01
ENSRNOG00000056537	0.00636525	0.650749	0.167	0.125	1	e01
AABR07044049.1	0.00638779	0.144869	0.675	0.602	1	e01
Zfand2a	0.00640749	0.362953	0.251	0.195	1	e01
Abcb6	0.00641984	0.332473	0.349	0.293	1	e01
Asb6	0.00642471	0.558112	0.103	0.068	1	e01
Ephb2	0.00643541	0.169009	0.675	0.618	1	e01
Ccdc28a	0.00647783	0.207867	0.234	0.178	1	e01
Psmf1	0.00650513	0.29412	0.347	0.289	1	e01
LOC100361655	0.00652711	0.480245	0.225	0.176	1	e01
Carmil1	0.00654416	0.123053	0.835	0.783	1	e01
Traf3	0.00656001	0.143043	0.856	0.799	1	e01
Mtmr3	0.00656437	0.127021	0.9	0.858	1	e01
Trdn	0.00661416	0.656263	0.062	0.037	1	e01
Ngef	0.00665635	0.23631	0.268	0.213	1	e01
Ak8	0.00667101	0.608585	0.11	0.075	1	e01
Ubxn2b	0.00669671	0.376908	0.313	0.263	1	e01
Vegfd	0.00669888	0.595083	0.096	0.063	1	e01
Usp18	0.00674637	0.894145	0.026	0.012	1	e01
Akna	0.00675483	0.949647	0.072	0.044	1	e01
Psip1	0.00675945	0.12604	0.883	0.851	1	e01
RGD1304694	0.00677384	0.219613	0.383	0.318	1	e01
Rps18	0.00682247	0.271291	0.349	0.295	1	e01
RGD1308428	0.0068414	0.195946	0.684	0.635	1	e01
Lsm12	0.00689907	0.145266	0.529	0.466	1	e01
Dnajc21	0.00690602	0.238806	0.368	0.308	1	e01
Ctxn1	0.00696693	0.288037	0.175	0.127	1	e01
Gp1bb	0.00699532	0.353693	0.218	0.167	1	e01
Iah1	0.00700377	0.466776	0.242	0.193	1	e01
Apba1	0.00704201	0.124636	0.923	0.886	1	e01
Ttc6	0.00708808	0.844467	0.084	0.054	1	e01
Ap1g2	0.00710541	0.487969	0.132	0.093	1	e01
Dync1i2	0.0071132	0.125185	0.95	0.925	1	e01
Lrpap1	0.00721007	0.190476	0.62	0.55	1	e01
Arhgap18	0.00722954	0.164707	0.699	0.631	1	e01
Bnip1	0.0072769	0.318654	0.292	0.236	1	e01
Ntmt1	0.00728946	0.402207	0.225	0.176	1	e01
Grhl3	0.00732797	0.741574	0.057	0.033	1	e01
Ptov1	0.007395	0.197692	0.577	0.52	1	e01
Smad2	0.00743054	0.187824	0.584	0.52	1	e01
Ccdc92	0.00744189	0.395438	0.268	0.219	1	e01
Gabra2	0.0074423	0.123188	0.794	0.746	1	e01
Nanp	0.00744367	0.324424	0.352	0.299	1	e01
Hsd17b3	0.00745168	0.714663	0.086	0.056	1	e01
Foxr1	0.00748694	0.965505	0.024	0.01	1	e01
Bicdl1	0.00757672	0.166741	0.847	0.803	1	e01
Celf5	0.00758913	0.180953	0.859	0.81	1	e01
Nr3c1	0.0076488	0.210372	0.359	0.298	1	e01
Nat8f1	0.00766987	0.734187	0.057	0.033	1	e01
Ubxn10	0.00767608	1.0078	0.045	0.025	1	e01
Car9	0.00767757	1.37601	0.019	0.007	1	e01
Ankrd13d	0.0076843	0.184692	0.758	0.698	1	e01
Ethe1	0.00770999	0.344764	0.187	0.14	1	e01
Cyp2a1	0.00771264	0.987021	0.033	0.016	1	e01
Cacna1b	0.00773492	0.106186	0.957	0.941	1	e01
Bcl9	0.00775584	0.261346	0.402	0.342	1	e01
Psma7	0.00776703	0.188369	0.667	0.608	1	e01
Gba2	0.00777515	0.186492	0.727	0.691	1	e01
AC096601.1	0.00777582	2.74979	0.01	0.003	1	e01
RGD1306626	0.00783963	1.03843	0.062	0.037	1	e01
Zc3h8	0.00784644	0.271486	0.419	0.354	1	e01
AABR07054025.2	0.00785391	2.28748	0.01	0.003	1	e01
AABR07017874.1	0.00786139	2.37786	0.01	0.003	1	e01
Dnah12	0.00786945	0.318361	0.132	0.092	1	e01
Osbpl10	0.00789144	0.233184	0.581	0.517	1	e01
Ninl	0.00790263	0.622316	0.093	0.061	1	e01
Irf7	0.00790674	0.691791	0.127	0.09	1	e01
Hdac1	0.00790864	0.311412	0.39	0.336	1	e01
Gabrq	0.00796251	1.03293	0.029	0.013	1	e01
Poln	0.00796354	0.158586	0.665	0.614	1	e01
AABR07058174.1	0.00796964	0.756937	0.062	0.037	1	e01
Ttc25	0.00802042	0.679947	0.105	0.072	1	e01
Htra2	0.00806028	0.347127	0.328	0.274	1	e01
Dus1l	0.00808647	0.391997	0.242	0.194	1	e01
Smtn	0.00809877	0.859587	0.041	0.021	1	e01
Swap70	0.00812147	0.668398	0.096	0.064	1	e01
Wdr7	0.00814322	0.126474	0.933	0.876	1	e01
Sclt1	0.00818539	0.117154	0.928	0.916	1	e01
Trim16	0.0081945	0.800226	0.057	0.034	1	e01
Jagn1	0.00823353	0.383295	0.254	0.204	1	e01
Glt8d1	0.00833315	0.176488	0.823	0.793	1	e01
Ttll11	0.00834518	0.167917	0.837	0.799	1	e01
Myom3	0.00835003	1.75958	0.031	0.015	1	e01
Ndufc1	0.00836583	0.339377	0.263	0.212	1	e01
Ttc34	0.00839036	0.836114	0.041	0.021	1	e01
Calr4	0.00839268	1.21833	0.041	0.022	1	e01
Slc1a6	0.00841505	0.531468	0.079	0.05	1	e01
Vta1	0.0084284	0.275508	0.385	0.329	1	e01
Tcf20	0.0084327	0.13511	0.876	0.831	1	e01
Wnt3	0.00844973	1.21194	0.036	0.018	1	e01
Popdc3	0.00849985	1.81884	0.026	0.012	1	e01
Psd2	0.00855728	0.199321	0.569	0.497	1	e01
Fam120b	0.00857816	0.183163	0.694	0.643	1	e01
Snrnp48	0.00862938	0.164339	0.768	0.703	1	e01
Slc22a15	0.008677	0.301655	0.385	0.327	1	e01
Dzank1	0.00872273	0.153454	0.775	0.713	1	e01
Fndc1	0.00872458	1.32045	0.045	0.025	1	e01
Cd109	0.00872946	1.26786	0.05	0.029	1	e01
Scube1	0.00877093	0.38286	0.148	0.109	1	e01
Mcf2	0.00879269	0.52619	0.148	0.108	1	e01
Kdm5b	0.00880938	0.143931	0.782	0.736	1	e01
Rhof	0.00883894	0.404749	0.206	0.159	1	e01
Cr2	0.00891667	1.37276	0.026	0.012	1	e01
Camkk2	0.00896473	0.20231	0.414	0.35	1	e01
Tshz3	0.00901156	0.185427	0.297	0.239	1	e01
Helb	0.00905737	0.263336	0.356	0.298	1	e01
Ubac1	0.00907381	0.218603	0.474	0.418	1	e01
Rasa3	0.00909662	0.176144	0.493	0.418	1	e01
Capn12	0.00910715	0.571597	0.098	0.066	1	e01
Mob3c	0.00913163	0.873951	0.043	0.023	1	e01
Pcdhga5	0.00919716	1.34222	0.029	0.014	1	e01
Ywhah	0.00927517	0.146954	0.871	0.814	1	e01
Fdps	0.00931122	0.198199	0.687	0.639	1	e01
Hmga2	0.00931161	0.725146	0.038	0.02	1	e01
Fam173b	0.00933974	0.50434	0.189	0.144	1	e01
Nr3c1.1	0.00935646	0.633095	0.081	0.052	1	e01
Rnf138	0.00937607	0.220775	0.39	0.33	1	e01
RGD1310507	0.00938012	0.857263	0.053	0.03	1	e01
Rn50-9-0429.1	0.00941241	1.35862	0.019	0.008	1	e01
Samd5	0.00946063	0.119626	0.885	0.821	1	e01
Oprm1	0.00952963	0.261009	0.421	0.356	1	e01
Commd1	0.00957594	0.144873	0.77	0.72	1	e01
Atp2c2	0.00959396	1.20393	0.019	0.008	1	e01
Btbd17	0.00962373	0.562163	0.096	0.064	1	e01
Chrm3	0.00972875	0.645308	0.081	0.053	1	e01
Stmn2	0.00979295	0.118548	0.868	0.831	1	e01
Mlycd	0.00979296	0.288586	0.349	0.294	1	e01
Nt5e	0.0098405	0.146497	0.811	0.762	1	e01
Rasgrp2	0.00988895	0.333592	0.337	0.283	1	e01
Kdm5c	0.00990177	0.18547	0.656	0.619	1	e01
Snrnp40	0.00995425	0.191541	0.596	0.534	1	e01
Tbr1	0	4.2854	0.403	0.021	0	e02
Samd3	9.47e-274	3.94877	0.382	0.024	1.77e-269	e02
Tp73	4.74e-175	3.9002	0.27	0.019	8.87e-171	e02
Smoc2	3.51e-161	4.81361	0.197	0.01	6.57e-157	e02
Adamts19	3.42e-107	2.84406	0.5	0.111	6.4e-103	e02
Slc17a6	3.93e-99	1.77479	0.779	0.274	7.35e-95	e02
Tmem163	1.92e-95	1.47117	0.879	0.338	3.59e-91	e02
Slit1	2.22e-88	1.58855	0.942	0.586	4.16e-84	e02
C7	2.82e-87	3.78868	0.158	0.013	5.28e-83	e02
Cacna2d1	1.11e-80	1.1087	0.991	0.663	2.07e-76	e02
Adcy8	1.2e-74	1.49979	0.879	0.452	2.25e-70	e02
Nrn1	3.11e-72	2.28357	0.376	0.086	5.81e-68	e02
Epha3	4.61e-66	1.44827	0.797	0.388	8.62e-62	e02
Tmem132c	3.13e-64	1.88777	0.527	0.174	5.85e-60	e02
LOC102553190	1.05e-62	1.97705	0.297	0.06	1.96e-58	e02
Man1a1	3.46e-60	1.66393	0.706	0.312	6.47e-56	e02
Syt2	7.44e-55	2.31732	0.303	0.072	1.39e-50	e02
Plce1	9.66e-54	2.85207	0.367	0.106	1.81e-49	e02
AABR07050487.1	1.6e-49	2.30114	0.245	0.053	2.99e-45	e02
Sgpp2	6.06e-48	1.57058	0.633	0.293	1.13e-43	e02
Snhg11	9.9e-47	0.391974	1	0.998	1.85e-42	e02
Lhx1	6.02e-44	2.44678	0.136	0.02	1.13e-39	e02
Thsd7b	3.69e-42	1.20701	0.891	0.641	6.89e-38	e02
Grm2	1.87e-41	2.00444	0.245	0.059	3.5e-37	e02
Uncx	3.85e-41	2.55225	0.139	0.022	7.2e-37	e02
Bdnf	2.04e-40	1.51676	0.406	0.141	3.81e-36	e02
Zfhx4	3.11e-39	0.844233	0.933	0.682	5.82e-35	e02
Runx1t1	3.98e-39	0.920276	0.855	0.554	7.44e-35	e02
AABR07058816.1	5e-39	2.80957	0.118	0.017	9.34e-35	e02
Mtus2	1.93e-38	0.94647	0.861	0.576	3.6e-34	e02
Chrdl1	6.98e-38	2.19841	0.161	0.03	1.31e-33	e02
Kitlg	1.31e-37	1.71099	0.342	0.113	2.45e-33	e02
Erbb4	2.83e-37	0.862531	0.891	0.643	5.3e-33	e02
Kcnq5	1.45e-36	0.985192	0.77	0.441	2.71e-32	e02
Ano5	2.87e-36	1.46407	0.367	0.125	5.38e-32	e02
Cdh12	2.9e-36	1.21325	0.815	0.554	5.43e-32	e02
Flt3	2e-35	1.1818	0.691	0.388	3.75e-31	e02
Cntnap4	2.51e-35	0.778646	0.912	0.603	4.69e-31	e02
ENSRNOG00000060482	2.54e-34	1.17014	0.582	0.284	4.75e-30	e02
Me3	5.83e-34	0.812979	0.891	0.678	1.09e-29	e02
Ank3	7.76e-34	0.368428	1	0.994	1.45e-29	e02
AABR07033184.1	7.94e-34	0.715493	0.933	0.677	1.49e-29	e02
Mdga1	1.36e-33	1.17671	0.439	0.175	2.55e-29	e02
Fstl5	1.01e-32	0.838904	0.894	0.67	1.88e-28	e02
Nptx1	1.08e-32	1.15279	0.5	0.214	2.02e-28	e02
Cntnap5c	1.59e-32	0.702482	0.979	0.804	2.97e-28	e02
Scn1a	2.16e-32	0.580979	0.991	0.903	4.04e-28	e02
Rnf152	2.44e-32	1.27644	0.397	0.15	4.57e-28	e02
Robo1	1.79e-31	0.586231	0.991	0.827	3.34e-27	e02
Specc1	3.8e-31	0.649377	0.948	0.815	7.11e-27	e02
Barhl2	3.17e-30	4.69324	0.024	0.001	5.92e-26	e02
Ubash3b	4.69e-30	1.05967	0.733	0.466	8.77e-26	e02
Atp1a3	6.69e-30	0.537156	0.985	0.939	1.25e-25	e02
Lgr5	1.51e-29	1.37043	0.418	0.18	2.82e-25	e02
Grm7	4.31e-29	0.520673	0.994	0.927	8.06e-25	e02
Lhx9	1.37e-27	1.87118	0.13	0.027	2.56e-23	e02
Atp2b2	2.01e-27	0.469493	0.988	0.94	3.75e-23	e02
P2rx6	7.91e-27	2.34183	0.136	0.03	1.48e-22	e02
Olfm3	9.52e-27	1.04708	0.548	0.279	1.78e-22	e02
Meis2	9.81e-27	1.35077	0.37	0.156	1.83e-22	e02
Snph	1.16e-26	0.860863	0.797	0.568	2.17e-22	e02
Tenm4	4.78e-26	0.556351	0.988	0.907	8.94e-22	e02
Ppp1r14c	5.41e-26	1.09219	0.606	0.344	1.01e-21	e02
Cabp1	6.74e-26	1.17728	0.536	0.287	1.26e-21	e02
Siah3	7.13e-26	1.26094	0.382	0.16	1.33e-21	e02
P3h2	9.14e-26	1.60527	0.367	0.161	1.71e-21	e02
Coro6	1.2e-25	1.10009	0.415	0.181	2.24e-21	e02
AABR07024786.1	3e-25	0.687495	0.906	0.705	5.61e-21	e02
Mctp2	3.33e-25	1.42125	0.412	0.194	6.22e-21	e02
Nrg1	2.52e-24	0.723094	0.794	0.54	4.72e-20	e02
Ndst4	2.66e-24	0.983137	0.597	0.333	4.97e-20	e02
Car10	6.64e-24	0.559823	0.945	0.786	1.24e-19	e02
Mapk12	9.78e-24	1.39099	0.291	0.111	1.83e-19	e02
Ptchd4	3.48e-23	0.729864	0.876	0.636	6.5e-19	e02
AABR07055162.1	3.77e-23	0.894629	0.536	0.276	7.05e-19	e02
Fam19a2	6.19e-23	0.873226	0.612	0.348	1.16e-18	e02
Clvs1	6.31e-23	0.743596	0.815	0.57	1.18e-18	e02
Shisa6	6.88e-23	1.09185	0.548	0.307	1.29e-18	e02
Gabrb2	1.13e-22	0.690534	0.952	0.785	2.12e-18	e02
Cux2	1.32e-22	0.736457	0.77	0.54	2.46e-18	e02
Chsy3.1	1.84e-22	0.669804	0.876	0.681	3.45e-18	e02
Vwc2l	2.79e-22	0.584586	0.833	0.561	5.22e-18	e02
Nova1	1.22e-21	0.47549	0.976	0.895	2.27e-17	e02
AABR07027407.1	1.77e-21	2.0789	0.106	0.023	3.32e-17	e02
Plpp4	2.71e-21	1.01312	0.448	0.23	5.07e-17	e02
Kcna1	2.79e-21	1.67909	0.233	0.085	5.21e-17	e02
Slc4a10	3.9e-21	0.435277	0.985	0.94	7.29e-17	e02
Tmem91	7.47e-21	0.694296	0.876	0.701	1.4e-16	e02
AABR07071697.1	8.57e-21	0.941033	0.482	0.251	1.6e-16	e02
Asap2	1.25e-20	0.669474	0.821	0.606	2.34e-16	e02
Lgi3	1.38e-20	0.65652	0.794	0.549	2.58e-16	e02
Snap25	1.52e-20	0.413155	0.997	0.976	2.85e-16	e02
Cit	1.87e-20	0.566377	0.909	0.762	3.49e-16	e02
Dock9	2.83e-20	0.478423	0.936	0.797	5.29e-16	e02
Pamr1	5.4e-20	1.16762	0.348	0.158	1.01e-15	e02
Fras1	7.41e-20	0.944689	0.518	0.296	1.39e-15	e02
Nefh	9.38e-20	1.33168	0.303	0.131	1.76e-15	e02
Nxph4	1.01e-19	1.83433	0.115	0.028	1.89e-15	e02
Spock3	1.02e-19	0.467396	0.964	0.876	1.9e-15	e02
Scn4b	1.7e-19	2.81594	0.079	0.015	3.19e-15	e02
Atp6ap1l	3.57e-19	0.698171	0.436	0.212	6.67e-15	e02
Mapk11	3.62e-19	0.486657	0.964	0.847	6.77e-15	e02
2026-03-11	4.09e-19	0.76304	0.6	0.355	7.66e-15	e02
Tmem26	7.61e-19	1.19503	0.252	0.099	1.42e-14	e02
Pxdc1	8.47e-19	2.41725	0.073	0.013	1.58e-14	e02
Alk	2.26e-18	0.619318	0.77	0.552	4.23e-14	e02
Snca	2.41e-18	0.945895	0.53	0.31	4.51e-14	e02
Scn1b	5.88e-18	0.908233	0.497	0.282	1.1e-13	e02
Klhl1	9.71e-18	0.619026	0.797	0.557	1.82e-13	e02
Ano4	1.03e-17	0.590403	0.833	0.609	1.93e-13	e02
Caln1	1.16e-17	0.673915	0.848	0.684	2.17e-13	e02
Fam163a	1.3e-17	1.47977	0.136	0.04	2.42e-13	e02
Cgnl1	1.56e-17	2.19984	0.091	0.02	2.92e-13	e02
Cpeb2	1.98e-17	0.529926	0.924	0.737	3.7e-13	e02
Tmem150c	2.15e-17	0.618335	0.773	0.57	4.02e-13	e02
Pnoc	2.31e-17	1.21634	0.312	0.144	4.31e-13	e02
Ddi2	2.32e-17	0.637389	0.782	0.583	4.34e-13	e02
Slc12a1	2.33e-17	2.51906	0.073	0.014	4.36e-13	e02
AABR07053471.1	9.25e-17	3.59064	0.045	0.006	1.73e-12	e02
Trim7	9.3e-17	1.55284	0.182	0.065	1.74e-12	e02
Dlc1	1.03e-16	0.555075	0.855	0.647	1.92e-12	e02
Tmem132d	1.3e-16	0.505058	0.933	0.756	2.44e-12	e02
Cntnap5b	1.43e-16	0.524756	0.924	0.815	2.67e-12	e02
Rassf5	1.8e-16	0.817005	0.53	0.327	3.36e-12	e02
Kcnip1	2.68e-16	0.354837	0.93	0.752	5.02e-12	e02
Il10rb	3.36e-16	1.94556	0.127	0.038	6.28e-12	e02
Khdrbs2	4.4e-16	0.524562	0.942	0.825	8.22e-12	e02
Tbc1d4	6.25e-16	0.821645	0.482	0.277	1.17e-11	e02
Hrasls	7.14e-16	1.52108	0.161	0.055	1.33e-11	e02
Cplx1	7.55e-16	0.721434	0.582	0.372	1.41e-11	e02
Misp3	9.66e-16	1.70413	0.121	0.035	1.81e-11	e02
Epb41l3	1.37e-15	0.439927	0.888	0.737	2.55e-11	e02
Cdh18	1.45e-15	0.433713	0.958	0.815	2.72e-11	e02
Gpc6	1.76e-15	0.756017	0.888	0.777	3.29e-11	e02
Rasgrp2	2.1e-15	0.824179	0.476	0.279	3.94e-11	e02
Chl1	2.3e-15	0.672603	0.718	0.512	4.31e-11	e02
Dnm1	4.33e-15	0.323853	0.988	0.953	8.1e-11	e02
Rn50-13-0828.1	4.93e-15	3.58257	0.036	0.004	9.21e-11	e02
Nat8l	5.19e-15	0.946321	0.433	0.248	9.71e-11	e02
Vwc2	5.55e-15	0.531799	0.755	0.536	1.04e-10	e02
Reln	5.81e-15	1.12561	0.494	0.306	1.09e-10	e02
Asap1	6.23e-15	0.550691	0.794	0.615	1.16e-10	e02
Frem3	7.85e-15	1.45405	0.161	0.057	1.47e-10	e02
Zfp423	7.94e-15	0.574358	0.809	0.606	1.48e-10	e02
Apba2	1.06e-14	0.504987	0.882	0.77	1.98e-10	e02
Tenm2	1.1e-14	0.355313	0.979	0.856	2.05e-10	e02
Cdh11	1.12e-14	0.490981	0.842	0.665	2.09e-10	e02
Sez6	1.12e-14	0.431832	0.845	0.614	2.1e-10	e02
Mroh1	1.26e-14	0.52336	0.882	0.718	2.36e-10	e02
Sidt1	1.35e-14	0.65869	0.667	0.452	2.53e-10	e02
Gpr149	1.49e-14	0.791326	0.458	0.267	2.79e-10	e02
Cdh8	1.83e-14	0.458071	0.909	0.776	3.42e-10	e02
Slc9a2	1.97e-14	1.93869	0.109	0.032	3.68e-10	e02
Cabp7	2.11e-14	1.82181	0.079	0.018	3.95e-10	e02
AABR07050265.1	2.99e-14	1.01112	0.261	0.118	5.6e-10	e02
Hnf4a	3.3e-14	1.13318	0.236	0.102	6.18e-10	e02
Lin28b	4.15e-14	0.621701	0.576	0.364	7.75e-10	e02
Plcb4	4.22e-14	0.49757	0.855	0.701	7.89e-10	e02
Matk	4.29e-14	0.457535	0.939	0.791	8.02e-10	e02
Bcan	4.47e-14	0.76127	0.373	0.195	8.36e-10	e02
Gabra1	4.9e-14	0.575263	0.815	0.638	9.16e-10	e02
Ablim1	7.05e-14	0.416505	0.876	0.667	1.32e-09	e02
Vsnl1	7.13e-14	0.393872	0.927	0.777	1.33e-09	e02
Fat3	8.6e-14	0.423228	0.903	0.741	1.61e-09	e02
Cdk14	9.01e-14	0.396005	0.942	0.823	1.68e-09	e02
Grp	9.12e-14	1.54509	0.088	0.023	1.71e-09	e02
Kcnc1	1.01e-13	0.452369	0.9	0.795	1.89e-09	e02
Acyp2	1.05e-13	0.412281	0.952	0.84	1.96e-09	e02
AABR07001233.1	1.11e-13	0.749752	0.439	0.252	2.07e-09	e02
Col24a1	1.19e-13	1.42329	0.142	0.05	2.23e-09	e02
Mtap	1.32e-13	0.850514	0.361	0.191	2.47e-09	e02
Zfand2b	1.34e-13	0.708911	0.488	0.291	2.5e-09	e02
Dach1	2.23e-13	0.306148	0.494	0.292	4.18e-09	e02
Acp7	2.48e-13	3.68796	0.024	0.002	4.63e-09	e02
Palld	2.5e-13	0.718079	0.539	0.347	4.67e-09	e02
Spag5.1	2.64e-13	1.82269	0.088	0.024	4.94e-09	e02
AABR07008788.1	3.55e-13	0.867589	0.367	0.206	6.65e-09	e02
Bcl2	4.27e-13	0.779831	0.445	0.265	7.98e-09	e02
RGD1566099	4.49e-13	1.08901	0.203	0.086	8.39e-09	e02
Rsrp1	4.75e-13	0.258817	0.997	0.987	8.89e-09	e02
Klf3	5e-13	0.994853	0.258	0.121	9.35e-09	e02
Dscam	5.58e-13	0.307598	0.991	0.904	1.04e-08	e02
Csmd1	6.25e-13	0.486234	0.9	0.74	1.17e-08	e02
Rassf4	6.4e-13	1.55861	0.109	0.034	1.2e-08	e02
Hapln1	6.51e-13	2.26721	0.052	0.01	1.22e-08	e02
Gnas	8.66e-13	0.860208	0.539	0.364	1.62e-08	e02
Kcnab1	1.05e-12	0.460058	0.73	0.571	1.96e-08	e02
Slc9a4	1.08e-12	1.79677	0.076	0.019	2.02e-08	e02
Krt222	1.22e-12	0.582382	0.567	0.378	2.28e-08	e02
Nrg2	1.23e-12	0.440741	0.9	0.759	2.3e-08	e02
Nrg3	1.38e-12	0.597055	0.57	0.37	2.58e-08	e02
Mpped2	1.41e-12	0.502187	0.694	0.472	2.64e-08	e02
C3ar1	1.5e-12	1.20179	0.194	0.082	2.8e-08	e02
Sgk1	1.6e-12	0.490756	0.633	0.43	2.98e-08	e02
Egflam	1.76e-12	1.73466	0.082	0.022	3.29e-08	e02
Fgf11	1.89e-12	1.00919	0.206	0.089	3.53e-08	e02
Igsf21	2.07e-12	0.845828	0.264	0.126	3.86e-08	e02
LOC304725	2.22e-12	0.375018	0.927	0.79	4.16e-08	e02
Sptan1	2.43e-12	0.319928	0.994	0.955	4.55e-08	e02
Cbln2	2.57e-12	0.913176	0.291	0.148	4.8e-08	e02
P2rx5	3.38e-12	2.72539	0.042	0.007	6.32e-08	e02
Tango2	3.39e-12	0.329968	0.939	0.837	6.34e-08	e02
Spag1	3.45e-12	0.835951	0.47	0.306	6.45e-08	e02
Cntnap1	3.49e-12	0.584205	0.561	0.36	6.53e-08	e02
Dmd	3.62e-12	0.433532	0.988	0.976	6.76e-08	e02
Galnt14	3.81e-12	0.585369	0.445	0.26	7.12e-08	e02
Grin3a	4.29e-12	0.442829	0.676	0.465	8.03e-08	e02
Arhgap27	4.68e-12	1.92205	0.076	0.02	8.75e-08	e02
Il11ra1	5.29e-12	1.1097	0.206	0.092	9.89e-08	e02
Lhx2	5.42e-12	1.21686	0.124	0.043	1.01e-07	e02
Gas6	5.89e-12	0.429839	0.742	0.533	1.1e-07	e02
Fndc1	6.01e-12	1.60934	0.085	0.024	1.12e-07	e02
Tmem132a	7.55e-12	0.623776	0.588	0.402	1.41e-07	e02
Rnf14	7.74e-12	0.391124	0.903	0.781	1.45e-07	e02
Slit2	8.07e-12	0.697062	0.715	0.574	1.51e-07	e02
AABR07041418.1	8.57e-12	0.590448	0.558	0.365	1.6e-07	e02
Nos1	1.04e-11	0.710988	0.473	0.303	1.95e-07	e02
Hpn	1.15e-11	2.22199	0.048	0.01	2.15e-07	e02
Fam189a1	1.18e-11	0.480304	0.876	0.765	2.2e-07	e02
Pld5	1.19e-11	0.225073	0.712	0.5	2.23e-07	e02
Bnc2	1.2e-11	1.95278	0.067	0.017	2.24e-07	e02
Igsf5	1.29e-11	2.65289	0.048	0.01	2.42e-07	e02
Zfp385b	1.43e-11	0.281066	0.852	0.667	2.68e-07	e02
Dab2	1.7e-11	1.42021	0.112	0.038	3.18e-07	e02
Trhde	1.88e-11	0.278494	0.77	0.552	3.51e-07	e02
AABR07024457.1	1.93e-11	0.873755	0.273	0.138	3.6e-07	e02
AABR07060481.1	2.08e-11	0.534156	0.564	0.376	3.88e-07	e02
AABR07043877.2	2.08e-11	3.417	0.024	0.003	3.9e-07	e02
Tpk1	2.43e-11	0.592226	0.57	0.385	4.55e-07	e02
Rarb	2.63e-11	0.677141	0.312	0.167	4.92e-07	e02
Fgf1	2.7e-11	0.582727	0.533	0.342	5.05e-07	e02
Bend6	2.72e-11	0.519234	0.758	0.58	5.09e-07	e02
Cep120	2.84e-11	0.431881	0.782	0.631	5.31e-07	e02
Grin1	2.95e-11	0.290939	0.997	0.962	5.52e-07	e02
Wisp1	3.19e-11	3.59491	0.015	0.001	5.97e-07	e02
Egfem1	3.22e-11	0.601207	0.618	0.439	6.03e-07	e02
Rcan2	3.27e-11	0.393077	0.894	0.731	6.11e-07	e02
Psd3	3.81e-11	0.423117	0.858	0.733	7.13e-07	e02
Limk1	4.03e-11	0.626427	0.467	0.294	7.53e-07	e02
Zfyve9	4.1e-11	0.355502	0.906	0.785	7.67e-07	e02
Prkag2	4.56e-11	0.430719	0.833	0.665	8.53e-07	e02
Cd83	5.75e-11	0.683007	0.464	0.294	1.08e-06	e02
Serpini1	6.33e-11	0.458968	0.736	0.553	1.18e-06	e02
AABR07017145.1	6.63e-11	0.352578	0.961	0.871	1.24e-06	e02
Nacc2	7.26e-11	0.840298	0.309	0.171	1.36e-06	e02
Myo1b	7.31e-11	1.03403	0.37	0.222	1.37e-06	e02
Klhl32	8.13e-11	0.28264	0.93	0.834	1.52e-06	e02
AABR07041411.1	8.27e-11	0.680304	0.518	0.352	1.55e-06	e02
Kif26b	1.02e-10	0.458627	0.782	0.608	1.9e-06	e02
Asph	1.15e-10	0.392527	0.858	0.713	2.15e-06	e02
Cntn3	1.17e-10	0.268334	0.788	0.564	2.19e-06	e02
Epha6	1.26e-10	0.398781	0.873	0.734	2.36e-06	e02
AABR07043877.3	1.36e-10	2.88839	0.027	0.004	2.54e-06	e02
Sncb	1.43e-10	0.464646	0.573	0.378	2.68e-06	e02
Frmd4b	1.58e-10	0.384871	0.594	0.387	2.96e-06	e02
Abcb9	1.61e-10	0.618417	0.536	0.358	3.01e-06	e02
Hecw1	1.65e-10	0.235553	0.994	0.969	3.09e-06	e02
Tac1	1.71e-10	1.12218	0.303	0.172	3.19e-06	e02
ENSRNOG00000051069	1.83e-10	0.418102	0.845	0.686	3.43e-06	e02
Cadps	1.91e-10	0.230956	0.991	0.984	3.58e-06	e02
Slc27a2	2.35e-10	0.600578	0.412	0.247	4.39e-06	e02
Snx24	2.51e-10	0.377954	0.845	0.69	4.69e-06	e02
Sema6d	2.56e-10	0.596411	0.494	0.321	4.78e-06	e02
Dst	2.63e-10	0.199052	0.994	0.981	4.92e-06	e02
Fst	2.72e-10	1.9268	0.042	0.008	5.08e-06	e02
Khdrbs3	2.78e-10	0.555832	0.706	0.534	5.2e-06	e02
Cd59	3.1e-10	0.550896	0.652	0.481	5.8e-06	e02
Cntn6	3.46e-10	0.260222	0.864	0.67	6.46e-06	e02
Oxr1	3.48e-10	0.266335	0.994	0.947	6.51e-06	e02
Col26a1	3.54e-10	0.944181	0.197	0.092	6.61e-06	e02
Mad1l1	3.62e-10	0.758888	0.382	0.235	6.77e-06	e02
Ccdc28b	3.65e-10	0.545366	0.582	0.393	6.83e-06	e02
Nefl	3.89e-10	0.742132	0.391	0.238	7.27e-06	e02
St8sia1	4.15e-10	0.543868	0.452	0.28	7.75e-06	e02
Fam184a	4.2e-10	0.370636	0.824	0.667	7.86e-06	e02
Abracl	4.21e-10	0.983032	0.2	0.095	7.87e-06	e02
Adcy2	4.67e-10	0.479152	0.645	0.461	8.73e-06	e02
Ablim2	4.83e-10	0.344276	0.912	0.779	9.04e-06	e02
Lin7b	4.89e-10	0.627795	0.418	0.258	9.14e-06	e02
Gulp1	6.22e-10	0.631078	0.388	0.238	1.16e-05	e02
Gxylt2	6.32e-10	2.49943	0.058	0.015	1.18e-05	e02
Atp13a2	6.86e-10	0.333629	0.939	0.819	1.28e-05	e02
Chst9	6.98e-10	0.942738	0.124	0.048	1.31e-05	e02
Robo2	7.61e-10	0.290374	0.903	0.761	1.42e-05	e02
Ypel4	7.82e-10	0.472541	0.624	0.443	1.46e-05	e02
Grm5	8.58e-10	0.292202	0.979	0.888	1.6e-05	e02
Slc16a11	9.01e-10	0.456097	0.673	0.481	1.68e-05	e02
AABR07026483.1	9.82e-10	0.520554	0.7	0.525	1.84e-05	e02
Ncam2	1.01e-09	0.303825	0.939	0.795	1.89e-05	e02
Flrt1	1.02e-09	0.954579	0.239	0.124	1.9e-05	e02
Rasgef1b	1.04e-09	0.947792	0.23	0.118	1.95e-05	e02
AC122968.1	1.06e-09	0.984169	0.224	0.114	1.97e-05	e02
Grin2d	1.17e-09	0.731882	0.324	0.187	2.18e-05	e02
St5	1.18e-09	0.475009	0.688	0.522	2.2e-05	e02
Got1	1.21e-09	0.422995	0.691	0.52	2.27e-05	e02
Rapgef4	1.28e-09	0.303491	0.961	0.882	2.39e-05	e02
Phyh	1.33e-09	0.549067	0.558	0.38	2.49e-05	e02
Gsta4	1.36e-09	0.960003	0.188	0.088	2.54e-05	e02
Hsf4	1.42e-09	0.792696	0.309	0.176	2.65e-05	e02
Ralgapa2	1.57e-09	0.291947	0.912	0.768	2.93e-05	e02
Prkaa2	1.61e-09	0.50516	0.609	0.43	3.02e-05	e02
Elfn1	1.65e-09	0.724103	0.282	0.156	3.09e-05	e02
Pappa	1.69e-09	0.986667	0.276	0.152	3.17e-05	e02
LOC501033	1.8e-09	1.92915	0.052	0.013	3.37e-05	e02
Hcn1	1.84e-09	0.340273	0.867	0.776	3.44e-05	e02
Large1	1.89e-09	0.324011	0.982	0.905	3.53e-05	e02
Haghl	2.01e-09	0.569917	0.576	0.408	3.76e-05	e02
Aard	2.06e-09	1.80062	0.058	0.015	3.85e-05	e02
Isoc2b	2.11e-09	0.778837	0.282	0.156	3.94e-05	e02
Sptlc3	2.11e-09	0.487043	0.542	0.368	3.95e-05	e02
Sh3gl2	2.17e-09	0.312872	0.93	0.83	4.05e-05	e02
AABR07052327.1	2.38e-09	3.66062	0.018	0.002	4.45e-05	e02
Mctp1	2.43e-09	0.259135	0.827	0.677	4.54e-05	e02
Narfl	2.59e-09	0.530466	0.561	0.385	4.84e-05	e02
Dgki	2.7e-09	0.233457	0.982	0.929	5.05e-05	e02
Lhx5	2.78e-09	1.91892	0.058	0.015	5.21e-05	e02
F13a1	2.98e-09	1.80319	0.07	0.021	5.57e-05	e02
Tmem178a	3.04e-09	0.721249	0.43	0.283	5.69e-05	e02
Ak5	3.07e-09	0.42172	0.852	0.689	5.75e-05	e02
Ryr2	3.72e-09	0.253186	0.958	0.841	6.95e-05	e02
Plekha5	3.8e-09	0.372799	0.964	0.916	7.11e-05	e02
Unc5b	4.02e-09	1.03013	0.203	0.102	7.52e-05	e02
Ccdc27	4.12e-09	2.04578	0.055	0.014	7.7e-05	e02
Lepr	5.3e-09	0.613086	0.309	0.177	9.91e-05	e02
Epb41	5.34e-09	0.413626	0.782	0.631	9.99e-05	e02
Zmynd8	5.38e-09	0.214111	0.997	0.966	0.00010053	e02
Irf5	5.63e-09	1.26111	0.115	0.046	0.000105266	e02
AABR07001068.1	6.15e-09	0.551703	0.482	0.323	0.000114952	e02
AABR07060473.1	6.35e-09	0.755847	0.385	0.248	0.000118788	e02
Trpc3	6.35e-09	0.415581	0.336	0.192	0.00011879	e02
Sfxn5	6.4e-09	0.395011	0.6	0.426	0.000119618	e02
Ptpn3	6.96e-09	0.740573	0.261	0.143	0.000130091	e02
Efr3b	7.18e-09	0.610212	0.618	0.493	0.000134241	e02
Neto1	7.18e-09	0.299867	0.809	0.646	0.000134259	e02
Rps6ka1	7.21e-09	0.565381	0.342	0.201	0.00013484	e02
Lama3	7.25e-09	0.590389	0.394	0.245	0.000135553	e02
Hapln4	7.38e-09	0.549539	0.53	0.37	0.00013802	e02
Pdhb	7.42e-09	0.562773	0.518	0.362	0.000138802	e02
Rhobtb1	7.61e-09	0.818926	0.242	0.13	0.000142404	e02
Chst15	8.25e-09	0.885074	0.185	0.09	0.000154295	e02
Tspan17	8.34e-09	0.554469	0.385	0.237	0.000156065	e02
Ece2	8.52e-09	0.390788	0.755	0.628	0.000159303	e02
Tecr	8.86e-09	0.275995	0.964	0.91	0.000165724	e02
Cdk5rap2	9.18e-09	0.579537	0.497	0.341	0.000171707	e02
Sptbn4	9.18e-09	0.251793	0.967	0.9	0.000171738	e02
Slc8a3	9.19e-09	0.291794	0.93	0.846	0.000171879	e02
Aifm3	9.72e-09	0.689911	0.409	0.268	0.000181882	e02
Nefm	9.78e-09	0.872661	0.267	0.152	0.000182944	e02
Fosb	1.09e-08	2.47321	0.039	0.009	0.000204578	e02
Abcg3l1	1.17e-08	0.511073	0.427	0.269	0.000219198	e02
Rnf207	1.2e-08	0.845633	0.358	0.226	0.000224094	e02
Epha5	1.21e-08	0.202096	0.958	0.836	0.000225564	e02
Tmem164	1.37e-08	0.541245	0.618	0.471	0.0002571	e02
Grk5	1.38e-08	0.392461	0.648	0.474	0.000257938	e02
AABR07042733.2	1.4e-08	0.597549	0.342	0.208	0.000262423	e02
Rtn4r	1.47e-08	0.999325	0.158	0.073	0.000274544	e02
Mpp6	1.5e-08	0.448001	0.609	0.444	0.00027996	e02
Cox10	1.58e-08	0.493775	0.548	0.372	0.000295335	e02
Slc38a1	1.61e-08	0.296152	0.924	0.793	0.000300792	e02
Idh3g	1.65e-08	0.44896	0.552	0.386	0.000308869	e02
Dcc	1.67e-08	0.299256	0.967	0.864	0.000311767	e02
Slc24a2	1.76e-08	0.238223	0.921	0.782	0.000328873	e02
Rgs10	1.84e-08	0.781301	0.236	0.128	0.000344889	e02
Mcf2	1.87e-08	0.828239	0.206	0.106	0.000350545	e02
Atp8a2	2.16e-08	0.343107	0.933	0.856	0.000403621	e02
Sfxn4	2.25e-08	0.409516	0.63	0.445	0.000421466	e02
AABR07011934.1	2.31e-08	3.08522	0.012	0.001	0.000432199	e02
Onecut1	2.75e-08	0.879908	0.161	0.075	0.000513649	e02
Vwa5b2	2.84e-08	0.392287	0.712	0.566	0.000531494	e02
Nrxn1	2.9e-08	0.132867	1	1	0.000543083	e02
Kcnk10	3.03e-08	0.426015	0.612	0.431	0.00056672	e02
Fstl4	3.11e-08	0.48546	0.655	0.49	0.000581332	e02
Ank1	3.22e-08	0.501939	0.603	0.45	0.000602444	e02
Sparcl1	3.26e-08	0.336885	0.458	0.301	0.000609925	e02
Rnf112	3.36e-08	0.434442	0.676	0.52	0.000628948	e02
Lemd1	3.39e-08	0.433194	0.506	0.336	0.000633584	e02
Ptprr	3.61e-08	0.351891	0.858	0.724	0.00067532	e02
Flrt2	3.63e-08	0.372316	0.7	0.531	0.000679381	e02
Aldoc	3.7e-08	0.504009	0.421	0.275	0.000691879	e02
AABR07033234.1	3.74e-08	0.886328	0.17	0.082	0.000700368	e02
Il22ra2	3.79e-08	0.654369	0.279	0.16	0.000709543	e02
Spag5	3.89e-08	1.21797	0.118	0.05	0.000727797	e02
Aff3	3.96e-08	0.21898	0.991	0.907	0.000741076	e02
Dok5	4.06e-08	0.542583	0.418	0.271	0.000759216	e02
Sgcd	4.31e-08	0.415439	0.691	0.539	0.00080537	e02
Chrna4	4.46e-08	0.740293	0.248	0.138	0.000834005	e02
LOC100911519	4.59e-08	2.30689	0.039	0.009	0.000858271	e02
Pdzd2	4.62e-08	0.193838	0.536	0.359	0.000864697	e02
Rab26	4.69e-08	0.392461	0.679	0.515	0.000877162	e02
Mgat4c	4.95e-08	0.598493	0.224	0.119	0.000926449	e02
Galt	5.07e-08	0.57417	0.418	0.275	0.000948046	e02
ENSRNOG00000001825	5.41e-08	0.792542	0.218	0.119	0.00101121	e02
Smim17	5.77e-08	0.763269	0.23	0.125	0.00107869	e02
Clca4	5.8e-08	2.88827	0.024	0.004	0.00108481	e02
Pnpla3	5.86e-08	0.69787	0.261	0.147	0.001096	e02
Anks1b	6e-08	0.132247	1	0.993	0.00112295	e02
Cadm3	6.05e-08	0.326525	0.885	0.75	0.00113187	e02
Bckdhb	6.17e-08	0.341023	0.761	0.598	0.0011541	e02
Magi2	6.31e-08	0.232156	0.997	0.971	0.00118019	e02
Ifnar2	6.37e-08	0.798487	0.242	0.138	0.0011908	e02
Slc25a3	6.86e-08	0.503758	0.555	0.388	0.00128243	e02
Mab21l2	7.04e-08	1.55247	0.079	0.028	0.00131581	e02
AABR07067310.1	7.81e-08	0.465103	0.397	0.255	0.00146017	e02
Ttll2	7.89e-08	3.24798	0.012	0.001	0.0014763	e02
AABR07062350.1	7.9e-08	3.20324	0.012	0.001	0.00147842	e02
Plch1	8.07e-08	0.564388	0.442	0.304	0.00150914	e02
Slc9a9	8.09e-08	0.334432	0.806	0.649	0.00151308	e02
Luzp1	8.4e-08	0.439222	0.606	0.458	0.00157194	e02
Bcar3	8.79e-08	0.969614	0.142	0.066	0.00164307	e02
Tox3	8.93e-08	0.360798	0.691	0.516	0.0016711	e02
Tmem235	9.05e-08	3.33465	0.015	0.002	0.00169206	e02
Far2	9.22e-08	0.585444	0.476	0.33	0.00172484	e02
Alkbh7	9.31e-08	0.519013	0.373	0.234	0.00174215	e02
Rab27b	9.53e-08	0.57892	0.579	0.43	0.00178258	e02
Cdyl2	9.58e-08	0.591175	0.291	0.171	0.00179108	e02
Ralyl	9.69e-08	0.233938	0.976	0.908	0.00181234	e02
Apeh	1.01e-07	0.467724	0.621	0.467	0.00188076	e02
Epha10	1.03e-07	0.408907	0.591	0.432	0.00192954	e02
Rnaseh2c	1.04e-07	0.785714	0.161	0.077	0.00194192	e02
Sfmbt2	1.05e-07	0.607974	0.473	0.335	0.00196928	e02
Dusp4	1.09e-07	1.28004	0.082	0.03	0.00204755	e02
LOC100911486	1.1e-07	1.95468	0.042	0.011	0.00206334	e02
Tpo	1.14e-07	1.94857	0.042	0.011	0.00212458	e02
Brinp3	1.16e-07	0.269204	0.973	0.894	0.00216215	e02
Plekhh2	1.21e-07	0.381929	0.458	0.301	0.00225533	e02
Wbscr17	1.25e-07	0.301643	0.897	0.802	0.00234634	e02
Ripk4	1.28e-07	2.12629	0.036	0.008	0.00238812	e02
Rnf157	1.28e-07	0.32414	0.852	0.722	0.00239803	e02
Palm2	1.34e-07	0.362218	0.718	0.571	0.00250916	e02
Plxna2	1.35e-07	0.310442	0.73	0.588	0.0025237	e02
Bag1	1.37e-07	0.54771	0.345	0.214	0.00256389	e02
Oxct1	1.39e-07	0.388456	0.733	0.587	0.00259075	e02
Tekt5	1.45e-07	1.81197	0.052	0.015	0.00271	e02
AABR07033757.1	1.47e-07	0.771159	0.197	0.104	0.00274303	e02
Tfdp2	1.5e-07	0.362894	0.83	0.683	0.00279616	e02
Ring1	1.5e-07	0.553687	0.355	0.222	0.00279739	e02
E2f1	1.64e-07	0.536522	0.433	0.287	0.00307565	e02
Vegfc	1.72e-07	1.16711	0.194	0.104	0.00322338	e02
Fam196a	1.75e-07	0.372717	0.518	0.358	0.00327686	e02
Mgst3	1.76e-07	0.828793	0.23	0.129	0.00329668	e02
Tax1bp1	1.81e-07	0.272946	0.894	0.781	0.00337822	e02
Akain1	1.87e-07	1.54279	0.048	0.014	0.00349123	e02
Acsl6	2.15e-07	0.294508	0.827	0.712	0.00401835	e02
LOC683897	2.19e-07	0.472534	0.476	0.325	0.00409966	e02
Trim65	2.2e-07	0.671075	0.221	0.121	0.00411301	e02
Pdzd7	2.38e-07	0.706911	0.221	0.12	0.00445714	e02
Zc3h12d	2.47e-07	1.52579	0.067	0.023	0.0046277	e02
AABR07052897.3	2.56e-07	0.422493	0.603	0.438	0.00479635	e02
Nfyb	2.8e-07	0.415122	0.558	0.406	0.00522915	e02
RGD1560608	2.87e-07	1.4067	0.064	0.021	0.00536155	e02
Il1rl1	2.9e-07	2.31087	0.024	0.004	0.00541974	e02
LOC103693780	2.95e-07	0.329862	0.879	0.763	0.00551481	e02
Tmem132b	3.07e-07	0.422671	0.585	0.436	0.00573691	e02
Rell2	3.2e-07	0.46916	0.403	0.265	0.00598872	e02
Plbd2	3.22e-07	0.360754	0.536	0.381	0.00602614	e02
Glp1r	3.58e-07	1.69921	0.058	0.018	0.00669772	e02
Synpo2l	3.6e-07	0.780587	0.197	0.106	0.00673007	e02
Kdm2b	3.65e-07	0.337538	0.715	0.55	0.00681729	e02
Igfbp5	3.71e-07	0.84017	0.309	0.198	0.0069311	e02
Tfap2e	3.75e-07	3.26952	0.024	0.004	0.00700604	e02
Sntb2	3.86e-07	0.383952	0.588	0.434	0.00721172	e02
Fndc4	3.96e-07	0.62177	0.258	0.148	0.00741534	e02
Htr4	4.37e-07	0.170668	0.791	0.618	0.00816925	e02
Slc9a5	4.61e-07	0.497009	0.473	0.33	0.00863037	e02
Mettl8	4.89e-07	0.5142	0.258	0.148	0.00913881	e02
Entpd5	5.08e-07	0.517328	0.367	0.238	0.00951043	e02
Paqr7	5.19e-07	0.588275	0.364	0.237	0.00970874	e02
Irf3	5.27e-07	0.389727	0.709	0.549	0.00985373	e02
Vsig10	5.37e-07	1.03238	0.118	0.053	0.0100377	e02
Rspo1	6.08e-07	1.76134	0.064	0.022	0.0113673	e02
Mpv17l	6.21e-07	0.463398	0.379	0.248	0.0116127	e02
Nlgn1	6.45e-07	0.182584	1	0.996	0.0120649	e02
Gpr137	6.61e-07	0.519608	0.361	0.233	0.0123542	e02
Focad	6.79e-07	0.252698	0.948	0.903	0.012708	e02
Ltk	6.87e-07	0.544298	0.297	0.18	0.0128526	e02
Hcn4	6.93e-07	0.776069	0.17	0.088	0.012954	e02
Osbpl1a	6.94e-07	0.321565	0.815	0.656	0.0129778	e02
Grin2a	7.01e-07	0.317262	0.521	0.364	0.0131115	e02
Fgfr2	7.62e-07	0.244181	0.406	0.257	0.0142588	e02
Carmil1	8.68e-07	0.237273	0.897	0.782	0.0162421	e02
Timp2	8.7e-07	0.391207	0.721	0.608	0.0162717	e02
Cep83	8.71e-07	0.264648	0.836	0.726	0.0162883	e02
Rn50-13-0822.1	9.26e-07	0.234791	0.873	0.738	0.0173253	e02
Ccser1	9.29e-07	0.257912	0.982	0.929	0.0173777	e02
Kcns3	9.37e-07	0.907999	0.118	0.055	0.0175243	e02
Foxp2	9.51e-07	0.425599	0.333	0.223	0.0177798	e02
Dok6	9.69e-07	0.17758	0.979	0.928	0.0181165	e02
Cdh10	9.76e-07	0.279771	0.848	0.727	0.0182629	e02
Pkd1	9.93e-07	0.267558	0.921	0.836	0.0185642	e02
Slco3a1	9.98e-07	0.272786	0.888	0.774	0.0186655	e02
Pax6	1.02e-06	1.7821	0.045	0.013	0.0190244	e02
Slc6a7	1.02e-06	0.41583	0.415	0.275	0.0190317	e02
Trpm4	1.03e-06	1.1646	0.121	0.057	0.0192539	e02
Azin2	1.03e-06	0.791829	0.173	0.092	0.0193543	e02
Trpm3	1.08e-06	0.24097	0.718	0.567	0.0202532	e02
AABR07033285.1	1.12e-06	1.30594	0.076	0.029	0.021017	e02
Nell1	1.14e-06	0.300145	0.836	0.72	0.0213277	e02
Ube2ql1	1.24e-06	0.366185	0.506	0.351	0.0231596	e02
Rbfox1	1.24e-06	0.208377	0.921	0.804	0.0232371	e02
Rap1gap	1.25e-06	0.423425	0.588	0.439	0.0233734	e02
Stxbp1	1.29e-06	0.203414	0.97	0.904	0.0240572	e02
Aplp2	1.3e-06	0.275243	0.803	0.67	0.0243057	e02
Hs6st1	1.33e-06	0.46909	0.491	0.355	0.0249137	e02
Plec	1.35e-06	0.366442	0.682	0.52	0.0253284	e02
Dysf	1.38e-06	0.620565	0.173	0.092	0.0257922	e02
Camk1d	1.41e-06	0.185331	0.758	0.587	0.0262966	e02
RGD1565775	1.43e-06	0.28384	0.773	0.649	0.0267357	e02
Smarca2	1.45e-06	0.327332	0.87	0.786	0.0270345	e02
Ptprk	1.47e-06	0.246676	0.682	0.52	0.027469	e02
Hcn3	1.47e-06	0.452673	0.4	0.264	0.0275508	e02
Nkiras1	1.49e-06	0.643757	0.176	0.094	0.0277805	e02
Tfap2b	1.49e-06	3.08925	0.012	0.001	0.0278347	e02
Nfic	1.51e-06	0.642326	0.255	0.152	0.0282545	e02
Nubp1	1.54e-06	0.631571	0.227	0.131	0.0288013	e02
Gpr143	1.58e-06	0.659588	0.218	0.126	0.0296326	e02
Lrrfip1	1.61e-06	0.338394	0.758	0.623	0.0302027	e02
Ebf3	1.64e-06	1.09161	0.07	0.026	0.0307293	e02
Adam12	1.65e-06	0.469359	0.352	0.233	0.0309451	e02
Steap2	1.67e-06	0.830993	0.164	0.086	0.0311954	e02
Slc7a3	1.67e-06	0.461515	0.406	0.28	0.0313242	e02
Macrod1	1.68e-06	0.352145	0.715	0.583	0.0313859	e02
Nrp1	1.68e-06	0.264031	0.733	0.574	0.031408	e02
Il18r1	1.68e-06	2.23274	0.021	0.004	0.0314516	e02
Peli2	1.68e-06	0.745462	0.33	0.213	0.0314762	e02
Lynx1	1.7e-06	0.488057	0.336	0.216	0.0318193	e02
Grem2	1.73e-06	0.443276	0.464	0.327	0.0323442	e02
Lmtk2	1.74e-06	0.284573	0.773	0.631	0.0325284	e02
Zfp521	1.76e-06	0.318835	0.697	0.543	0.0328398	e02
Ache	1.79e-06	0.291339	0.621	0.465	0.0335499	e02
Agrn	1.8e-06	0.363295	0.715	0.566	0.0335753	e02
Sfxn3	1.82e-06	0.435727	0.406	0.276	0.0340342	e02
Mpdu1	1.82e-06	0.522032	0.309	0.2	0.0340398	e02
Ccdc136	1.82e-06	0.292794	0.873	0.749	0.034128	e02
Hdac9	1.96e-06	0.222655	0.776	0.626	0.0365976	e02
Pla2r1	2.06e-06	0.999752	0.097	0.042	0.0384712	e02
Ces1d	2.06e-06	2.34935	0.03	0.007	0.0386199	e02
Rims1	2.12e-06	0.181372	1	0.979	0.0395942	e02
Mpp7	2.15e-06	0.471252	0.455	0.325	0.040255	e02
Unc80	2.17e-06	0.226877	0.918	0.881	0.0405667	e02
Nr6a1	2.26e-06	0.605917	0.233	0.137	0.0422638	e02
Ifit2	2.28e-06	0.994664	0.109	0.05	0.0425932	e02
Grin3b	2.3e-06	1.74808	0.033	0.008	0.0430909	e02
Npy	2.31e-06	2.33946	0.021	0.004	0.0431716	e02
AABR07068447.1	2.33e-06	2.43814	0.021	0.004	0.0436659	e02
Cdc14b	2.35e-06	0.320702	0.818	0.678	0.0439852	e02
Wdtc1	2.48e-06	0.330484	0.606	0.451	0.0464658	e02
Zrsr1	2.53e-06	0.48895	0.385	0.259	0.0472608	e02
Grik2	2.53e-06	0.116156	1	0.992	0.0473816	e02
Grm1	2.6e-06	0.37116	0.873	0.785	0.0485826	e02
Hlcs	2.62e-06	0.416888	0.736	0.606	0.0490388	e02
Cntn2	2.63e-06	0.372983	0.509	0.361	0.0491344	e02
AABR07042733.1	2.63e-06	0.540886	0.242	0.145	0.0492379	e02
Tcirg1	2.67e-06	0.703872	0.197	0.112	0.0498594	e02
Ndufc1	2.72e-06	0.605712	0.321	0.21	0.0508462	e02
Mettl15	2.8e-06	0.448014	0.361	0.236	0.0523229	e02
Junb	2.81e-06	1.30872	0.109	0.051	0.0525482	e02
Plekho1	2.83e-06	0.449214	0.303	0.189	0.052884	e02
Kcp	2.84e-06	0.768809	0.197	0.112	0.0530355	e02
Pgr	2.87e-06	0.215126	0.458	0.313	0.0537234	e02
Anks6	2.94e-06	0.407597	0.509	0.372	0.0550522	e02
Myg1	2.96e-06	0.542662	0.212	0.121	0.0552856	e02
Fam98c	3e-06	0.351775	0.642	0.486	0.0560739	e02
Acan	3.18e-06	1.68719	0.067	0.025	0.059395	e02
Etv3l	3.18e-06	4.50407	0.012	0.001	0.0594059	e02
MAST1	3.24e-06	0.26076	0.885	0.792	0.0605589	e02
Tmem120a	3.31e-06	0.361356	0.536	0.402	0.0619958	e02
Arhgap22	3.35e-06	0.423778	0.412	0.287	0.0625934	e02
AC115420.4	3.46e-06	0.556443	0.318	0.204	0.0647082	e02
Col5a1	3.56e-06	1.63532	0.033	0.009	0.0666408	e02
Zfp503	3.61e-06	1.17915	0.052	0.017	0.0675117	e02
Fos	3.77e-06	1.03185	0.127	0.063	0.0704776	e02
Pkdcc	3.78e-06	0.679305	0.252	0.155	0.0706389	e02
Klhl36	3.88e-06	0.662699	0.194	0.11	0.0724793	e02
Nup93	3.89e-06	0.251014	0.8	0.646	0.0727768	e02
Smco4	3.89e-06	0.768088	0.136	0.068	0.0728435	e02
Dnajc4	3.95e-06	0.599941	0.239	0.145	0.073958	e02
AABR07010468.1	3.98e-06	0.409089	0.491	0.367	0.074446	e02
Sla2	3.99e-06	0.30412	0.788	0.656	0.0745939	e02
Ddit3	4.01e-06	0.419804	0.361	0.238	0.0750002	e02
Slc35f1	4.02e-06	0.318234	0.752	0.617	0.0752569	e02
Card9	4.05e-06	0.788876	0.13	0.065	0.0757327	e02
Rab11fip4	4.14e-06	0.26369	0.83	0.717	0.0774217	e02
AC118833.1	4.3e-06	3.11595	0.015	0.002	0.0804602	e02
Lrsam1	4.45e-06	0.451322	0.418	0.295	0.0833074	e02
Ndufb5	4.62e-06	0.333985	0.542	0.396	0.0864358	e02
Klc2	4.69e-06	0.335959	0.612	0.474	0.0876996	e02
Srgap2	4.74e-06	0.223333	0.909	0.785	0.0886436	e02
AABR07026473.1	4.85e-06	0.516375	0.315	0.207	0.0907842	e02
Uqcrh	4.89e-06	0.338306	0.712	0.591	0.0915086	e02
AABR07032496.1	4.96e-06	0.359484	0.758	0.615	0.0927204	e02
Rab32	4.97e-06	1.72094	0.027	0.006	0.0929933	e02
Sema3d	5.04e-06	1.06769	0.127	0.064	0.0941918	e02
Plch2	5.12e-06	0.269954	0.436	0.296	0.0958418	e02
Rpusd3	5.36e-06	0.756484	0.203	0.119	0.10016	e02
Slc52a2	5.4e-06	0.720458	0.112	0.053	0.100945	e02
Stac2	5.52e-06	1.05824	0.085	0.036	0.103157	e02
Rnf215	5.55e-06	0.3991	0.461	0.327	0.103776	e02
Cyc1	5.74e-06	0.468233	0.485	0.367	0.107427	e02
AABR07056845.1	5.75e-06	1.23098	0.076	0.031	0.107492	e02
Fndc5	5.77e-06	0.372952	0.367	0.245	0.107994	e02
Car2	5.85e-06	0.364036	0.358	0.246	0.109374	e02
Mab21l1	5.89e-06	1.27034	0.058	0.021	0.110146	e02
Elf2	5.9e-06	0.396655	0.458	0.323	0.110287	e02
Riok2	6.1e-06	0.509951	0.3	0.194	0.114164	e02
Hdc	6.19e-06	1.84518	0.024	0.005	0.115719	e02
Ankrd55	6.3e-06	0.362633	0.803	0.699	0.117901	e02
Trmt11	6.33e-06	0.505752	0.297	0.188	0.118323	e02
Antxr1	6.48e-06	0.803158	0.191	0.111	0.121108	e02
Aaed1	6.54e-06	0.37228	0.618	0.49	0.122266	e02
Ccdc43	6.55e-06	0.756799	0.13	0.065	0.122492	e02
Gal3st1	6.55e-06	1.00986	0.112	0.054	0.122552	e02
Sirt7	6.75e-06	0.397093	0.53	0.393	0.126227	e02
Nhlh2	6.79e-06	1.47029	0.045	0.014	0.127075	e02
Pdcd7	6.85e-06	0.394823	0.564	0.429	0.128047	e02
Hexb	6.94e-06	0.340851	0.467	0.328	0.129863	e02
B4galnt1	7e-06	0.306796	0.448	0.306	0.130881	e02
Kif2c	7.05e-06	3.01386	0.015	0.002	0.131777	e02
Panx2	7.09e-06	0.623184	0.245	0.151	0.132641	e02
Sdsl	7.11e-06	0.555155	0.221	0.131	0.133041	e02
St8sia5	7.15e-06	0.412965	0.27	0.167	0.133682	e02
Prdx5	7.25e-06	0.523199	0.33	0.219	0.135565	e02
Plcxd3	7.26e-06	0.212594	0.773	0.628	0.135875	e02
Esrrb	7.27e-06	2.5905	0.015	0.002	0.13597	e02
Iffo1	7.37e-06	0.25947	0.752	0.64	0.137775	e02
Tnr	7.39e-06	0.258731	0.827	0.728	0.138203	e02
Dgcr6	7.51e-06	0.526073	0.258	0.159	0.140469	e02
Tmem241	7.54e-06	0.39478	0.515	0.386	0.141007	e02
Nxpe3	7.66e-06	0.428522	0.503	0.38	0.143243	e02
Ctnnbl1	7.75e-06	0.310827	0.676	0.538	0.144915	e02
Pdss2	8.02e-06	0.23437	0.815	0.687	0.150089	e02
Glt1d1	8.17e-06	0.461591	0.376	0.255	0.152806	e02
Efcab5	8.19e-06	1.41052	0.061	0.023	0.153263	e02
Pcdh11x	8.25e-06	0.210452	0.555	0.417	0.154365	e02
Ubac1	8.51e-06	0.336444	0.548	0.417	0.159154	e02
Ndufb9	8.55e-06	0.435748	0.461	0.336	0.159868	e02
Arf1	9.47e-06	0.448692	0.306	0.198	0.17712	e02
Arc	9.59e-06	1.4071	0.027	0.006	0.17928	e02
Fgf12	9.59e-06	0.187753	0.988	0.948	0.179407	e02
Tdrp	9.7e-06	0.520768	0.297	0.192	0.181353	e02
Col19a1	9.78e-06	0.355011	0.264	0.166	0.182944	e02
Lrtm2	9.79e-06	0.412913	0.309	0.202	0.183081	e02
Sorcs3	9.87e-06	0.193729	0.764	0.63	0.184523	e02
Dgkq	9.87e-06	0.388486	0.47	0.344	0.184665	e02
Ikbke	1.02e-05	0.811443	0.109	0.052	0.189997	e02
Pqlc2	1.02e-05	0.463122	0.361	0.247	0.191488	e02
LOC100366030	1.06e-05	0.53169	0.37	0.253	0.199066	e02
Fam177a1	1.07e-05	0.589834	0.279	0.18	0.200516	e02
Atg4d	1.08e-05	0.3073	0.597	0.458	0.202359	e02
LOC102551716	1.1e-05	0.116257	0.973	0.888	0.205233	e02
Lgi2	1.12e-05	0.384872	0.312	0.202	0.209133	e02
Coq9	1.12e-05	0.411266	0.427	0.303	0.209662	e02
Kcna2	1.12e-05	0.416873	0.376	0.262	0.209671	e02
UST4r	1.13e-05	1.48384	0.055	0.02	0.21085	e02
Srxn1	1.13e-05	0.915611	0.124	0.063	0.212241	e02
Tnfrsf12a	1.14e-05	1.01534	0.094	0.043	0.213757	e02
Tmem25	1.15e-05	0.38602	0.385	0.268	0.215436	e02
AABR07059258.1	1.16e-05	0.178691	0.955	0.858	0.217808	e02
Atp23	1.18e-05	0.438383	0.355	0.236	0.220859	e02
Shd	1.18e-05	0.325334	0.582	0.439	0.220923	e02
Eml2	1.18e-05	0.253361	0.839	0.722	0.221222	e02
AABR07006097.1	1.21e-05	0.891504	0.115	0.057	0.225765	e02
LOC500877	1.22e-05	1.24351	0.058	0.021	0.228774	e02
Alkbh2	1.24e-05	0.679347	0.127	0.065	0.231305	e02
Ttc39b	1.25e-05	0.381729	0.47	0.331	0.232887	e02
Gtdc1	1.25e-05	0.247391	0.77	0.649	0.233945	e02
Arl5b	1.26e-05	0.46753	0.285	0.181	0.235768	e02
Afg3l2	1.27e-05	0.312875	0.767	0.628	0.237272	e02
Spred1	1.31e-05	0.309967	0.739	0.613	0.244709	e02
AABR07050321.1	1.33e-05	2.79589	0.018	0.003	0.24852	e02
Fggy	1.35e-05	0.360772	0.542	0.408	0.252937	e02
Clec2l	1.39e-05	0.383835	0.345	0.232	0.259107	e02
Laptm4b	1.39e-05	0.365146	0.276	0.175	0.260473	e02
Stub1	1.42e-05	0.300479	0.53	0.385	0.264999	e02
Ctnnd2	1.43e-05	0.121016	0.994	0.991	0.26658	e02
Baalc	1.43e-05	0.358767	0.445	0.311	0.266672	e02
Phb	1.46e-05	0.339589	0.439	0.307	0.273896	e02
Hcn2	1.47e-05	0.31788	0.588	0.433	0.275004	e02
Dkk3	1.48e-05	0.695055	0.273	0.179	0.276454	e02
Slc50a1	1.48e-05	0.38699	0.418	0.299	0.277704	e02
AABR07067462.1	1.49e-05	2.11598	0.021	0.004	0.27826	e02
Inhba	1.49e-05	0.818046	0.085	0.038	0.279422	e02
Ammecr1	1.52e-05	0.405442	0.558	0.429	0.28358	e02
Tpp1	1.54e-05	0.397242	0.258	0.159	0.287527	e02
Ace	1.55e-05	0.772461	0.161	0.09	0.290401	e02
Zfhx3	1.58e-05	0.136223	0.858	0.673	0.295855	e02
Icos	1.6e-05	1.06661	0.079	0.034	0.299007	e02
Col2a1	1.61e-05	1.05917	0.109	0.054	0.300309	e02
Mast2	1.61e-05	0.201556	0.939	0.872	0.301085	e02
Slc4a8	1.61e-05	0.317193	0.697	0.584	0.301654	e02
AC132760.1	1.63e-05	1.17554	0.07	0.029	0.304462	e02
Atp8b1	1.64e-05	1.45893	0.055	0.02	0.307228	e02
Tas1r2	1.64e-05	0.318601	0.548	0.397	0.307657	e02
Wdr59	1.66e-05	0.309488	0.536	0.399	0.31026	e02
LOC360919	1.67e-05	0.377764	0.291	0.187	0.312338	e02
Prkrip1	1.7e-05	0.256077	0.621	0.458	0.317722	e02
Pnkd	1.7e-05	0.329387	0.755	0.646	0.318418	e02
Syt12	1.7e-05	0.403612	0.394	0.274	0.318781	e02
Adam11	1.71e-05	0.361151	0.588	0.449	0.319954	e02
Adamts2	1.74e-05	0.509073	0.248	0.158	0.325611	e02
Chpf2	1.75e-05	0.47424	0.258	0.161	0.327344	e02
Zfp612	1.76e-05	0.383594	0.594	0.459	0.329335	e02
Crat	1.76e-05	0.776718	0.148	0.081	0.329954	e02
Rbfox3	1.82e-05	0.334783	0.455	0.318	0.34076	e02
Yipf2	1.86e-05	0.369105	0.327	0.217	0.347226	e02
Lifr	1.88e-05	0.51917	0.164	0.092	0.351864	e02
Ccdc150	1.88e-05	0.475396	0.291	0.186	0.352081	e02
Trpm2	1.92e-05	0.689669	0.197	0.119	0.358941	e02
Edil3	1.93e-05	0.276978	0.921	0.87	0.361879	e02
Sema3f	1.99e-05	0.772321	0.188	0.112	0.372232	e02
Sytl2	2.04e-05	0.777037	0.106	0.051	0.381604	e02
Rab27a	2.05e-05	0.328453	0.339	0.224	0.383699	e02
Kdsr	2.07e-05	0.531316	0.173	0.098	0.38651	e02
Akt1	2.08e-05	0.443863	0.276	0.175	0.389117	e02
Actl6a	2.09e-05	0.509688	0.255	0.162	0.391585	e02
Prkci	2.09e-05	0.289825	0.512	0.376	0.39177	e02
Scn8a	2.1e-05	0.201733	0.955	0.908	0.392255	e02
Cdc25b	2.1e-05	0.528299	0.182	0.105	0.392286	e02
Flywch1	2.1e-05	0.271123	0.809	0.676	0.393095	e02
AABR07070714.1	2.16e-05	1.13481	0.073	0.031	0.403427	e02
Kcnab2	2.16e-05	0.335204	0.658	0.552	0.403921	e02
AABR07035008.1	2.19e-05	0.574465	0.182	0.105	0.408864	e02
Rfx8	2.23e-05	1.46966	0.055	0.02	0.417434	e02
Magi3	2.25e-05	0.250953	0.797	0.687	0.42051	e02
Garnl3	2.25e-05	0.24842	0.867	0.757	0.421038	e02
Art3	2.25e-05	1.10426	0.073	0.031	0.421528	e02
Dync1h1	2.28e-05	0.244799	0.776	0.63	0.425533	e02
Tdrd7	2.3e-05	0.401662	0.406	0.288	0.430644	e02
Pou2f2	2.31e-05	0.416605	0.473	0.349	0.432405	e02
AABR07019088.1	2.31e-05	0.431216	0.345	0.233	0.43297	e02
Ngdn	2.35e-05	0.409612	0.567	0.437	0.439752	e02
Tmem223	2.36e-05	0.683737	0.133	0.071	0.441322	e02
Pcp4l1	2.38e-05	0.380747	0.179	0.103	0.445354	e02
Cntfr	2.39e-05	0.323908	0.315	0.206	0.447162	e02
Kcnk3	2.44e-05	0.497895	0.3	0.198	0.455494	e02
Gpr22	2.44e-05	0.512297	0.206	0.122	0.456211	e02
2026-09-04	2.49e-05	0.213375	0.7	0.543	0.465035	e02
Prss23	2.49e-05	1.09228	0.045	0.015	0.465517	e02
Nrp2	2.51e-05	0.230076	0.718	0.579	0.468775	e02
Atp1b3	2.51e-05	0.38792	0.561	0.433	0.469115	e02
Spats2l	2.51e-05	0.276464	0.685	0.547	0.469409	e02
Pard6b	2.58e-05	0.784419	0.115	0.058	0.482116	e02
Ces1f	2.58e-05	3.3238	0.015	0.003	0.482559	e02
Nr3c2	2.62e-05	0.197501	0.818	0.697	0.489349	e02
Smurf1	2.68e-05	0.227659	0.664	0.497	0.50052	e02
Kcnk1	2.78e-05	0.448637	0.364	0.256	0.519468	e02
Mical3	2.82e-05	0.219813	0.9	0.773	0.527368	e02
Stk39	2.84e-05	0.255291	0.83	0.699	0.530956	e02
Tuba4a	2.9e-05	0.516178	0.221	0.134	0.542421	e02
Aatf	2.93e-05	0.333574	0.573	0.435	0.547684	e02
Atp5g1	2.96e-05	0.282384	0.609	0.468	0.55362	e02
Thy1	3.08e-05	0.522086	0.297	0.202	0.576181	e02
Pgam1	3.15e-05	0.279679	0.521	0.383	0.589797	e02
Abca7	3.19e-05	0.592436	0.191	0.114	0.596458	e02
Afap1	3.2e-05	0.368079	0.382	0.265	0.598477	e02
Baiap2	3.2e-05	0.219797	0.573	0.434	0.599367	e02
S100a10	3.23e-05	0.999398	0.088	0.041	0.603431	e02
Lime1	3.31e-05	0.427953	0.261	0.164	0.619073	e02
Slc44a1	3.36e-05	0.219968	0.842	0.747	0.628925	e02
Rhod	3.36e-05	1.61371	0.033	0.01	0.628945	e02
Nectin1	3.43e-05	0.364031	0.512	0.382	0.642096	e02
Ppm1f	3.5e-05	0.394145	0.509	0.389	0.654831	e02
Tmem63b	3.5e-05	0.258399	0.827	0.742	0.655133	e02
Sec31b	3.51e-05	0.948825	0.067	0.028	0.656168	e02
Usp50	3.54e-05	1.11343	0.052	0.019	0.661235	e02
Pde3a	3.55e-05	0.406713	0.239	0.152	0.663249	e02
Cisd3	3.56e-05	0.392391	0.218	0.131	0.665141	e02
Nt5c3b	3.69e-05	0.33155	0.533	0.402	0.689883	e02
Osbpl9	3.7e-05	0.21511	0.888	0.815	0.691428	e02
Sh3yl1	3.74e-05	0.481588	0.297	0.198	0.698813	e02
C5	3.75e-05	1.39953	0.039	0.013	0.700666	e02
Tmlhe	3.75e-05	0.294463	0.618	0.493	0.701817	e02
Atp6v0b	3.82e-05	0.243719	0.942	0.904	0.713737	e02
Dpys	3.83e-05	1.55932	0.052	0.019	0.716348	e02
Eef2k	3.86e-05	0.34956	0.427	0.309	0.72185	e02
Has2	3.92e-05	1.95521	0.03	0.009	0.733622	e02
Slc22a23	3.93e-05	0.230756	0.794	0.649	0.735693	e02
Fanca	3.94e-05	0.658746	0.097	0.046	0.737653	e02
Fam69b	3.98e-05	0.288225	0.506	0.366	0.745076	e02
ENSRNOG00000042264	4e-05	2.7076	0.012	0.002	0.74744	e02
Rn50-1-1360.1	4.04e-05	2.32064	0.015	0.003	0.755647	e02
Map1b	4.06e-05	0.141107	0.997	0.984	0.758915	e02
Fbxl8	4.08e-05	1.08873	0.067	0.028	0.763694	e02
Ctla4	4.12e-05	1.22482	0.064	0.026	0.769793	e02
Elovl5	4.17e-05	0.799278	0.115	0.06	0.780441	e02
Rxfp2	4.22e-05	1.83612	0.052	0.019	0.788921	e02
Kcnh7	4.26e-05	0.276784	0.67	0.552	0.796915	e02
Syt3	4.26e-05	0.287525	0.673	0.538	0.797583	e02
Tmem141	4.3e-05	0.484229	0.221	0.137	0.803758	e02
AABR07004404.1	4.3e-05	0.771609	0.091	0.043	0.804464	e02
Ddx24	4.31e-05	0.220248	0.942	0.852	0.805871	e02
Nicn1	4.34e-05	0.283902	0.542	0.398	0.810839	e02
Slc38a2	4.44e-05	0.276494	0.685	0.54	0.830068	e02
Rabepk	4.48e-05	0.441629	0.397	0.292	0.836982	e02
Frmpd3	4.5e-05	0.729444	0.115	0.059	0.841048	e02
Ubap1l	4.5e-05	0.418311	0.312	0.209	0.841285	e02
Vwa1	4.57e-05	0.712359	0.109	0.055	0.85453	e02
AABR07029634.4	4.63e-05	1.81726	0.024	0.006	0.866315	e02
Adk	4.72e-05	0.241732	0.745	0.639	0.882612	e02
Gstm6	4.73e-05	1.01807	0.103	0.052	0.885474	e02
Rpusd1	4.86e-05	0.514135	0.197	0.118	0.908852	e02
Gria4	5.02e-05	0.124566	0.997	0.987	0.938599	e02
AABR07003304.2	5.03e-05	0.438515	0.282	0.187	0.941404	e02
Tbc1d30	5.06e-05	0.313107	0.445	0.32	0.946538	e02
Ppp1r15a	5.13e-05	0.662123	0.121	0.063	0.95887	e02
Dhrs1	5.33e-05	0.342248	0.488	0.357	0.997617	e02
Cpq	5.34e-05	0.248256	0.433	0.31	0.998478	e02
Egr1	5.39e-05	0.819489	0.097	0.048	1	e02
Nudt7	5.53e-05	0.65685	0.152	0.086	1	e02
Lrch1	5.56e-05	0.268015	0.839	0.727	1	e02
Haus7	5.57e-05	0.38843	0.288	0.19	1	e02
Tmem145	5.61e-05	0.219602	0.736	0.608	1	e02
AABR07008724.1	5.66e-05	1.08499	0.067	0.028	1	e02
Slc20a2	5.8e-05	0.278645	0.624	0.502	1	e02
Fastkd1	5.85e-05	0.316376	0.527	0.395	1	e02
[truncated: 70,154 more rows]
