# Supplementary material
Source: Research Square preprint supplement (doi:10.21203/rs.3.rs-9421274/v1)
Supplement: Supplementary file 2 [file 8063c21796a56c135a6a2664.xlsx]

## Sheet: Fig. 1
Fig. 1c								Fig. 1g
Number of MPNNts neurons								Firing frequency
diestrus	proestrus	estrus	metestrus					current(pA)	proestrus																diestrus
160.5	256.333	192.667	216					0	4	0	0	0	6	0	4	4	2	0	0	2	2	0	2	2	0	0	0	0	0	0	2	2	0	0	0	0	4	2
185.667	199.333	206	167.333					2	0	0	0	2	10	0	2	4	0	0	0	4	6	2	2	4	0	0	0	0	0	0	0	2	0	0	0	0	6	0
165	218.667	192.25	201.333					4	2	2	2	4	10	0	4	6	4	0	0	4	6	2	6	4	0	0	0	0	0	2	4	4	2	0	0	0	8	4
153.75	203.667	201	113					6	2	4	4	2	12	2	6	8	2	0	0	6	8	2	4	6	0	0	2	0	0	2	6	4	4	2	0	0	10	6
169	227.75	220.667	179.333					8	6	4	4	4	10	0	6	6	4	0	0	10	12	4	2	8	0	2	2	0	0	2	6	6	4	0	2	0	12	4
173.5	203.5	178.333	125.667					10	4	4	4	6	12	4	6	6	4	2	0	8	12	2	6	12	2	2	2	0	0	4	8	6	4	2	2	0	14	4
								12	6	6	4	8	8	4	8	4	8	2	0	8	12	4	10	12	2	2	4	0	0	4	8	8	8	2	2	0	14	8
Fig. 1e				Fig. 1f				14	6	6	6	8	8	4	8	6	6	6	0	10	14	4	6	14	4	2	2	0	0	6	8	8	8	2	4	2	14	10
Spontaneous firing frequency				Resting membrane potential				16	4	10	8	6	6	2	8	6	6	6	0	12	18	4	10	14	4	4	4	0	0	6	8	10	10	2	4	2	14	10
diestrus	proestrus			diestrus	proestrus			18	6	8	10	10	12	8	10	4	8	6	2	12	18	6	8	16	4	4	2	2	0	6	12	12	10	2	4	2	16	12
0	0.866667			-61.1536	-48.7729			20	12	10	8	8	14	8	12	4	10	4	2	16	20	4	10	18	4	4	2	2	0	6	12	12	10	4	4	2	18	12
0	0.2			-59.7026	-48.9951			22	14	10	8	10	12	4	10	4	8	6	2	14	20	2	8	18	4	4	2	2	0	6	10	12	10	2	4	2	16	12
0	0.033333			-54.2961	-58.8343			24	14	12	10	10	10	8	12	4	12	4	4	14	22	4	8	20	6	6	6	2	2	8	10	12	10	2	4	2	18	14
0	0.3			-61.8551	-47.3751			26	14	14	10	12	12	4	10	4	10	8	4	16	24	4	8	22	4	6	4	2	2	8	14	12	10	4	4	4	18	14
0	7.16667			-58.3141	-37.9501			28	14	12	10	12	12	6	12	4	12	8	4	16	24	4	8	24	6	6	2	2	2	8	14	14	10	2	6	2	20	14
0.033333	0			-43.8149	-33.9779
1.43333	2.46667			-43.1433	-40.1959
0.9	3			-44.6866	-39.3706
0.466667	1.26667			-47.9922	-44.633
0	0.066667			-45.1605	-22.6234
0	0			-47.0853	-37.9501
0	2.76667			-50.6785	-33.9779
3.66667	1.4			-47.8186	-25.6076
0.366667	0.433333			-43.0296	-45.9074
	0.366667				-46.0898
	1.76667				-45.4783

## Sheet: Fig. 2
Fig.2b
MPNNts neurons %
esr1+pgr+	others
79.6	20.4
81.2	18.8
85	15
Fig.2g
Number of MPNNts&Pgr neurons
OO	OP	EO	EP
127.333	80.3333	273	438.333
55.3333	64.3333	283.667	381
44.3333	99	213.333	449.667
	79	166.333	396.333
		255.667
Fig.2h
Normalized luciferase activity (AU)
log[progesterone], M	luciferase
-11	0.974996	1.20016	0.985344	0.839504
-10	1.15115	1.50689	1.31003	1.28706
-9	3.44692	3.90594	4.09124	3.448
-8	7.09598	8.46433	6.58112	7.8024
-7	8.31641	8.04806	9.83316	7.66844
-6	8.15079	9.59361	9.07798	9.88056
-5	6.84092	7.78988	7.20424	7.02957

## Sheet: Fig. 4
Fig. 4c
GnRH neurons %
	nts+			nts-
soma	66.2162	80.4124	76.1194	33.7838	19.5876	23.8806
dendrite	73.4694	77.3333	73.4694	26.5306	22.6667	26.5306
Fig. 4e				Fig. 4f
Spontaneous firing frequency				Resting membrane potential
aCSF	Nts			aCSF	Nts
3.93	4.78			-42.0931	-38.3163
6.4818	8.6			-45.3092	-37.1188
1.3865	3.22			-52.1115	-52.8882
6.0286	7.692			-40.0694	-35.6461
1.6849	2.0046			-55.3253	-58.1457
3.16	2.8866			-49.5338	-45.6954
6.05	6.28			-43.3046	-39.65
0.365	0.96			-49.988	-46.5796
2.39	2.65			-45.2529	-41.9846
Fig. 4i				Fig. 4j
Spontaneous firing frequency				Resting membrane potential
Pre	Post			Pre	Post
2.2	2.8			-32.9194	-31.9602
0	0			-57.7425	-56.4056
1.5	2.3			-43.9121	-41.4965
2.7	3.2			-37.2313	-36.9419
2.1	2.6			-46.4143	-44.1942
5.6	5.7			-37.4933	-34.7236
5.7	5.5			-47.2154	-47.1089
4.3	5.2			-39.3575	-37.3183
2.2	2			-55.0769	-56.013
Fig. 4m				Fig. 4n
Spontaneous firing frequency				Resting membrane potential
Pre	Post			Pre	Post
6.7	6.9			-38.5881	-36.5519
5.8	5.6			-46.9077	-46.5891
5.7	4.5			-42.4481	-42.4485
2.2	1.8			-44.1936	-44.2628
0.6	0.1			-52.9559	-56.0322
0	0			-56.2973	-56.6045
0.4	0.4			-37.1665	-36.7383
0.9	1.3			-37.6957	-38.3484
0	0			-39.3834	-41.234

## Sheet: Fig. 5
Fig. 5e
kd efficiency
Kd-Nts	Kd-Pgr
94.6772	88.5701
95.6305	79.9749
99.3679	87.2236
Fig. 5o					Fig. 5p
Estrous cycle					cystic follicles
Ctrl	Kd-Nts	Kd-Pgr			Ctrl	Kd-Nts	Kd-Pgr
3.5	5.25	5.25			0	14	15
3.5	7	21			2	7	17
3.5	21	10.5			0	15	8
3.5	21	21			0	5	5
4.2	21	21			0	15	8
4.2	21	10.5			0	10	9
3.5	10.5	5.25			0	9	8
3.5		5.25			0		10
5.25					0
3.5					0
3.5					1
3.5					4
3					0

## Sheet: Extended Data Fig. 2
Extended Data Fig. 2d
MPNNts neurons %
Cre+			Cre-
76.5105	81.2297	73.6196	23.4895	18.7703	26.3804
MPNCre neurons %
Nts+			Nts-
90.8194	87.1159	91.3706	9.18061	12.8841	8.62944

## Sheet: Extended Data Fig. 4
Extended Data Fig. 4a				Extended Data Fig. 4b
Rheobase current (pA)				Input resistence (GΩ)
diestrus	proestrus			diestrus	proestrus
2	0			1.1898	0.9339
8	4			0.9875	1.2207
6	4			0.9357	1.038
18	2			0.7348	1.4281
24	0			0.8444	1.2811
4	6			1.3318	1.7484
0	0			1.0885	1.0906
0	0			1.1106	1.1601
6	0			0.8118	0.8241
6	10			1.2853	0.7408
8	18			0.6944	0.725
14	0			0.6812	1.3193
0	0			2.2167	1.2168
0	2			0.5284	0.597
	0				0.7824
	0				1.4192

## Sheet: Extended Data Fig. 5
Extended Data Fig. 5b
nts+ pgr+ esr1+	0.819
nts+ esr1+pgr-	0.143
nts+ esr1-pgr+	0.003
nts+esr1-pgr-	0.035

## Sheet: Extended Data Fig. 6
Extended Data Fig. 6b
Fold change of Nts Integrated Density
OO	OP	EO	EP
0.805296	5.00646	11.0277	28.5504
1.08248	4.53288	10.8248	48.7792
1.11223	8.18624	17.1843	41.6754
	2.97682	10.5542	45.8023
		19.0787
Extended Data Fig. 6c
Number of MPNNts neurons
OO	OP	EO	EP
269	212	358	565.333
197.333	207	373	486.667
227	238.667	253	515
	217.333	200.333	451.333
		306
Extended Data Fig. 6e
Fold change of Pgr Integrated Density
OO	OP	EO	EP
0.286789	6.03969	592.856	698.188
0.418128	3.26143	622.934	541.036
2.29508	4.34858	478.948	730.441
	3.8654	443.193	838.189
		510.958

## Sheet: Extended Data Fig. 7
Extended Data Fig. 7b
Normalized luciferase reporter activity
0	-11	-9	-7	-5
1.02463	0.974996	3.44692	8.31641	6.84092
0.980771	1.20016	3.90594	8.04806	7.78988
0.994602	0.985344	4.09124	9.83316	7.20424
	0.839504	3.448	7.66844	7.02957

## Sheet: Extended Data Fig. 9
Extended Data Fig. 9a
gad1+			gad1-
73.4694	79.5866	76.528	26.5306	20.4134	23.472
Extended Data Fig. 9b
gad2+			gad2-
91.5158	94.0355	92.7034	8.48416	5.96447	7.29665
Extended Data Fig. 9c
Slc17a6+			Slc17a6-
6.60981	11.7068	8.5671	93.3902	88.2932	91.4329
Extended Data Fig. 9d
pde11a+			pde11a-
66.5772	73.8	75.4401	33.4228	26.2	24.5599
Extended Data Fig. 9e
tac3+			tac3-
26.3209	31.411	25.53	73.6791	68.589	74.47

[truncated: 10 more sheets: Extended Data Fig. 10, Extended Data Fig. 13, Extended Data Fig. 14, Extended Data Fig. 15, Extended Data Fig. 16, Extended Data Fig. 17, Extended Data Fig. 19, Extended Data Fig. 20, Extended Data Fig. 21, Extended Data Fig. 22]
